1

2 **Stable integrant-specific differences in bimodal HIV-1 expression**  
3 **patterns revealed by high-throughput analysis**

4

5 David F. Read<sup>1,2</sup>, Edmond Atindaana<sup>2,3</sup>, Kalyani Pyaram<sup>2</sup>, Feng Yang<sup>2</sup>, Sarah Emery<sup>1</sup>, Anna  
6 Cheong<sup>1</sup>, Katherine R. Nakama<sup>2</sup>, Erin T. Larragoite<sup>4</sup>, Emilie Battivelli<sup>5,6</sup>, Eric Verdin<sup>5,6</sup>, Vicente  
7 Planelles<sup>4</sup>, Cheong-Hee Chang<sup>2\*</sup>, Alice Telesnitsky<sup>2\*</sup> and Jeffrey M. Kidd<sup>1\*</sup>

8

9

10 Departments of <sup>1</sup>Human Genetics and of <sup>2</sup>Microbiology and Immunology, University of Michigan  
11 Medical School; <sup>3</sup>West African Centre for Cell Biology of Infectious Pathogens (WACCBIP),  
12 Department of Biochemistry, Cell & Molecular Biology, University of Ghana, Accra, Ghana;  
13 <sup>4</sup>Department of Pathology, University of Utah, Salt Lake City, UT; <sup>5</sup>Department of Medicine,  
14 University of California San Francisco, San Francisco, CA; <sup>6</sup>Buck Institute for Research on  
15 Aging, Novato, CA

16

17

18

19 \*To whom correspondence should be addressed:

20 Jeffrey M. Kidd

21 [jmkidd@umich.edu](mailto:jmkidd@umich.edu)

22 Department of Human Genetics

23 University of Michigan Medical School

24 Ann Arbor, MI 48109

25

26 Alice Telesnitsky

27 [ateles@umich.edu](mailto:ateles@umich.edu)

28 Department of Microbiology and Immunology

29 University of Michigan Medical School

30 Ann Arbor, MI 18109-5620

31

32 Cheong-Hee Chang

33 [heechang@umich.edu](mailto:heechang@umich.edu)

34 Department of Microbiology and Immunology

35 University of Michigan Medical School

36 Ann Arbor, MI 18109-5620

37

38 **Abstract**

39 HIV-1 gene expression is regulated by host and viral factors that interact with viral motifs and is  
40 influenced by proviral integration sites. Here, expression variation among integrants was  
41 followed for hundreds of individual proviral clones within polyclonal populations throughout  
42 successive rounds of virus and cultured cell replication. Initial findings in immortalized cells were  
43 validated using CD4+ cells from donor blood. Tracking clonal behavior by proviral “zip codes”  
44 indicated that mutational inactivation during reverse transcription was rare, while clonal  
45 expansion and proviral expression states varied widely. By sorting for provirus expression using  
46 a GFP reporter in the *nef* open reading frame, distinct clone-specific variation in on/off  
47 proportions were observed that spanned three orders of magnitude. Tracking GFP phenotypes  
48 over time revealed that as cells divided, their progeny alternated between HIV transcriptional  
49 activity and non-activity. Despite these phenotypic oscillations, the overall GFP+ population  
50 within each clone was remarkably stable, with clones maintaining clone-specific equilibrium  
51 mixtures of GFP+ and GFP- cells. Integration sites were analyzed for correlations between  
52 genomic features and the epigenetic phenomena described here. Integrants inserted in genes’  
53 sense orientation were more frequently found to be GFP negative than those in the antisense  
54 orientation, and clones with high GFP+ proportions were more distal to repressive H3K9me3  
55 peaks than low GFP+ clones. Clones with low frequencies of GFP positivity appeared to expand  
56 more rapidly than clones for which most cells were GFP+, even though the tested proviruses  
57 were Vpr-. Thus, much of the increase in the GFP- population in these polyclonal pools over  
58 time reflected differential clonal expansion. Together, these results underscore the temporal and  
59 quantitative variability in HIV-1 gene expression among proviral clones that are conferred in the  
60 absence of metabolic or cell-type dependent variability, and shed light on cell-intrinsic layers of  
61 regulation that affect HIV-1 population dynamics.

62

## 63 **Summary**

64  
65           Very few HIV-1 infected cells persist in patients for more than a couple days, but those  
66 that do pose life-long health risks. Strategies designed to eliminate these cells have been based  
67 on assumptions about what viral properties allow infected cell survival. However, such  
68 approaches for HIV-1 eradication have not yet shown therapeutic promise, possibly because  
69 much of the research underlying assumptions about virus persistence has been focused on a  
70 limited number of infected cell types, the averaged behavior of cells in diverse populations, or  
71 snapshot views. Here, we developed a high-throughput approach to study hundreds of distinct  
72 HIV-1 infected cells and their progeny over time in an unbiased way. This revealed that each  
73 virus established its own pattern of gene expression that, upon infected cell division, was stably  
74 transmitted to all progeny cells. Expression patterns consisted of alternating waves of activity  
75 and inactivity, with the extent of activity differing among infected cell families over a 1000-fold  
76 range. The dynamics and variability among infected cells and within complex populations that  
77 the work here revealed has not previously been evident, and may help establish more accurate  
78 correlates of persistent HIV-1 infection.

79

80

## 81 **Introduction**

82           Early in the HIV-1 replication cycle, a DNA intermediate integrates into the host cell's  
83 genome. HIV-1 replication ordinarily progresses into its late phases, with host and viral factors  
84 leading to gene expression, virion production, and cell death and/or virus spread. However,  
85 some proviruses can remain dormant upon integration. In patients, the resulting latently infected  
86 cells persist throughout antiretroviral treatment, and their sporadic reactivation can lead to virus  
87 rebound after antiretroviral cessation.

88           This source of persistent virus is called the latent reservoir, and is believed to consist  
89 largely of transcriptionally silent proviruses integrated into resting memory T cells [1] [2] [3].

90 Experimentally, infectious virus can be produced from such patients' T lymphocytes when they  
91 are activated or treated with certain chromatin remodeling drugs *ex vivo*. These observations  
92 inspired "shock and kill" HIV cure strategies, which involve pharmacologically inducing provirus  
93 expression to promote the recognition and clearance of latently infected cells [4] [5]. However,  
94 while drug treatments that reactivate silenced proviruses can activate HIV-1 gene expression in  
95 cell culture models of latency, such treatments have thus far failed to fulfill their promise in the  
96 clinic, suggesting much remains to be learned about the establishment and maintenance of the  
97 latent reservoir [6] [7] [8].

98 HIV-1 gene expression requires sequence motifs within proviral sequences that specify  
99 nucleosome positioning and allow HIV-1 to respond to host factor differences among infected  
100 cell types [9] [10] [11]. HIV-1 has a marked preference for integration in transcriptionally active  
101 genome regions [12, 13]. Specific integration sites also influence HIV gene expression [14] [15]  
102 [16] [17]. Certain host chromatin binding factors as well as nuclear architecture further bias the  
103 distribution of integration sites [18, 19]. It has been postulated that integration sites may affect  
104 the odds of a provirus establishing long-lived latency [20]. Differences in HIV-1 expression due  
105 to integration site features likely influence the extent to which cells survive and proliferate after  
106 HIV-1 integration, and in turn contribute to the expression profile of persistent HIV-1 [21].

107 Recent work with patient samples has demonstrated that for at least some suppressed  
108 patients, residual provirus-containing cells are polyclonal yet dominated by a limited number of  
109 clonal subsets [22], and similar observations of clonal expansion have been made during HIV-1  
110 infection of humanized mice [23]. Thus, the integration sites represented in persistent proviruses  
111 likely differ from the spectrum initially generated [21].

112 Recent evidence indicates that latent proviruses differ in the extents to which they can  
113 be reactivated, and that a large majority of cells harboring latent proviruses may be refractory to  
114 our current arsenal of reactivation agents [24, 25]. Work using dual color reporter viruses in  
115 primary cells has shown that proviruses differ in their reactivation potential depending on their

116 sites of integration, with chromatin context as maintained within the confines of the nucleus  
117 being a significant contributing factor [25]. Additional work monitoring HIV-1 expression in  
118 individual cells has questioned the earlier view that complete proviral silencing is necessary for  
119 infected cell persistence during antiretroviral therapy [26, 27].

120         The majority of proviruses detectable in suppressed patients are replication defective  
121 [26, 28]. Although such proviruses are incapable of rekindling infection, emerging evidence  
122 suggests they can be expressed and may contribute to pathogenesis [26, 29].

123         In this study, we developed a high throughput approach to monitor cellular and viral  
124 progeny of individual integration events within complex populations, and used it to address the  
125 frequency of defective provirus formation and the extent to which provirus integration sites affect  
126 provirus expression levels. Initial work was performed using transformed cell lines, where  
127 selective pressures and variation of intracellular factors should be lower than in primary cells,  
128 with additional experiments performed in CD4+ lymphocytes from donor blood. Examining the  
129 extent of expression variation within and among cellular progeny of large panels of individual  
130 HIV-1 integration events indicated that in all these cell types, epigenetic differences among  
131 proviral clones led to the establishment of distinct heritable patterns of HIV-1 gene expression.

132

### 133 **Results:**

#### 134 ***Using randomized vectors to produce zip coded proviruses***

135         We developed a system to uniquely identify individual HIV-1 proviral lineages within  
136 polyclonal integrant populations, track proviral gene expression, and monitor replication  
137 properties of individual cell clones and their viral progeny. To achieve this, HIV-1 based vectors  
138 were established that each contained a unique 20-base randomized sequence tag. Once  
139 integrated, these were referred to as “zip coded” proviruses because the randomized tags  
140 reported the proviruses’ locations in the human genome.

141 Zip coded proviruses were templated by pNL4-3 GPP, a NL4-3 strain derivative that  
142 encodes Gag, Pol, Tat and Rev plus a puromycin-resistance reporter expressed from a  
143 secondary, internal promoter (SV40; Figure 1A, upper construct). pNL4-3 GPP lacks *env* and all  
144 accessory genes including *nef*, which was disrupted by the sequence tags [30]. Tags were  
145 inserted into the upstream edge of U3, downstream of sequences required for integrase  
146 recognition and upstream of the site of nuc0 nucleosome binding [11]. Vector RNAs were  
147 transcribed from uncloned DNA template libraries containing randomized tags, which were  
148 generated by *in vitro* assembly and without amplification by plasmid replication. This  
149 experimental approach resulted in the introduction of a unique randomized 20-mer into each  
150 encapsidated viral RNA. Because the process of reverse transcription duplicates U3, each  
151 progeny provirus contained the same randomized tag in both LTRs, and each provirus's tags  
152 differed from those in every other integrant.

153 To validate this approach, adherent 293T cells were transduced at a very low (<0.00005)  
154 multiplicity of infection with VSV-G pseudotyped particles containing a random sequence-  
155 containing vector library. Ten individual puromycin-resistant colonies were expanded, proviral  
156 DNA was amplified, and PCR products encompassing the randomized region were sequenced.  
157 The results showed that one clone lacked an insert while each of the other nine contained a  
158 single unique randomized 20-mer, no two of which were the same (Supplementary Table 1).

159

### 160 ***Nearly 90% of first-round proviruses supported a second round of replication***

161 An initial pooled-clone experiment was then performed, which established analysis  
162 procedures using a proviral pool of known complexity. This pilot study also addressed the  
163 frequency of defective provirus formation during a single replication round (Figure 1B). The pool  
164 was generated by infecting 293T cells with virions containing zip coded NL4-3 GPP RNAs,  
165 selecting a total of 71 well-separated puromycin-resistant colonies, trypsinizing them, and  
166 pooling these cells to generate the so-called F<sub>1</sub> cell pool. After expansion, a portion of the F<sub>1</sub> cell

167 pool was transfected with a VSV-G expression plasmid to generate pseudotyped virions (“F<sub>1</sub>  
168 virus”) that were used to infect fresh 293T cells. These “second generation” F<sub>2</sub> cells were placed  
169 under selection pressure and the resulting colonies were pooled to generate the F<sub>2</sub> cell pool.  
170 Because the number of colonies pooled to generate the F<sub>2</sub> cell pool--roughly 1000-- was  
171 significantly greater than the F<sub>1</sub> pool’s zip code complexity, any infectious zip code present in  
172 the F<sub>1</sub> pool was predicted to generate multiple F<sub>2</sub> integrants.

173 The ability of each provirus generated during the first round of replication to successfully  
174 complete a second round was addressed by examining each zip code’s prevalence throughout  
175 experimental stages. RNA from F<sub>1</sub> and F<sub>2</sub> virions was harvested and used to template cDNA  
176 libraries, and genomic DNA extracted from F<sub>1</sub> and F<sub>2</sub> cell pools was used to make provirus zip  
177 code libraries. High throughput data from all four libraries was analyzed to compare the zip code  
178 content of each pool (Figure 1B).

179 DNA from F<sub>1</sub> cells was found to contain 74 unique zip codes, which accounted for  
180 99.87% of total sequencing reads (Supplementary Figure 1). Based on the low multiplicity of  
181 infection used here and on subsequently-determined differences among zip codes in expression  
182 properties, the discrepancy between this value and the 71 colonies visualized on tissue culture  
183 plates was likely due to miscounting double colonies as single expanded clones, although the  
184 possibility of dual infection cannot be ruled out. F<sub>1</sub> cell, F<sub>1</sub> virus, and F<sub>2</sub> cell libraries were then  
185 compared to determine how many proviruses remained infectious after their initial round of  
186 replication (Figure 1C). Because 65 out of the 74 zip codes found in F<sub>1</sub> cell DNA were also  
187 observed in the F<sub>2</sub> cell library, these 65 (88% of F<sub>1</sub> cell zip codes) unambiguously represented  
188 proviruses capable of completing a second round of replication.

189 The remaining 9 zip codes were candidate non-infectious proviruses. If a first-round  
190 provirus were defective in ways that allowed virion assembly but not replication, such virus’ zip  
191 code might be detectable in F<sub>1</sub> virus but not in F<sub>2</sub> cells. Seven zip codes were candidates for this  
192 class of defective proviruses (green lines in Figure 1C).



193           The remaining two clones were initially enigmatic. The total number of colonies pooled to  
194 generate the F<sub>2</sub> library suggested it contained roughly twenty re-transduced copies of each F<sub>1</sub>  
195 zip code. Based on how frequently replication competence was maintained after the first round  
196 of replication, it was expected that any fully infectious F<sub>1</sub> provirus would display a roughly 90%  
197 second-round success rate. Thus, the likelihood that all ~20 sibling F<sub>2</sub> progeny of any infectious  
198 F<sub>1</sub> provirus would be defective seemed exceptionally low. Incongruously however, among the  
199 65 replication-competent zip codes detected in the F<sub>2</sub> cell library, two were not observed among  
200 sequencing reads from the F<sub>2</sub> virus RNA library.

201

202   ***Integrand clone expansion and provirus expression levels varied widely among zip coded***  
203   ***293T cell clones***

204           To address whether the absence of two F<sub>2</sub> cell zip codes from the F<sub>2</sub> virus library might  
205 reflect a population bottleneck, the number of sequencing reads associated with each zip code  
206 was compared within and across libraries. Unexpectedly, reads per zip code were observed to  
207 vary over three orders of magnitude within the F<sub>1</sub> cell library (Figure 1 D). Although variations in  
208 provirus-containing cells' expansion rates have been reported previously [31], the wide range in  
209 cell clone sizes observed here had not been anticipated.

210           Clone-specific differences in the amount of virus released per cell were also observed  
211 (Figure 1D, y axis). When normalized to the number of F<sub>1</sub> cells harboring a given zip code,  
212 clone-associated differences in virion release per cell spanned two orders of magnitude or  
213 more. Because of this, zip code abundance in the F<sub>1</sub> cell library was only moderately correlated  
214 with abundance in the F<sub>1</sub> virus RNA library (Figure 1D) (Spearman  $\rho = .639$ ). In contrast, the  
215 correlation between cell count and virion production was strong in the F<sub>2</sub> generation (Spearman  
216  $\rho = .890$ ) where each zip code was polyclonal (Figure 1 F), suggesting that virus-per-cell ratios  
217 were fairly consistent when averaged across many cell clones.

218           Looking specifically at sequencing read data for the two F<sub>2</sub> cell zip codes that were  
219   missing from F<sub>2</sub> virus libraries revealed that these lineages were scarce in both the F<sub>1</sub> virus and  
220   in F<sub>2</sub> cells (red points, Figure 1 E). Similarly, read frequency trends for the seven F<sub>1</sub> zip codes  
221   not observed in F<sub>2</sub> cells (green points, Figure 1 D) suggested that population bottlenecks, and  
222   not loss of infectivity, may account for some of these candidate non-infectious zip codes'  
223   absence from F<sub>2</sub> cells.

224

### 225   ***Clonal expansion in Jurkat cells***

226           Larger zip coded integrant populations were then established using Jurkat cells. The  
227   vector in these experiments (HIV GPV<sup>-</sup>) expressed all HIV-1 genes except *env*, *nef*, and *vpr*,  
228   contained GFP in the *nef* open reading frame, and expressed a puromycin resistance marker  
229   from a secondary, internal promoter (Figure 1A, lower construct). Selective concentrations of  
230   puromycin were applied 24 hours post-infection and removed four days later. Cells were  
231   subsequently maintained without drug. Like dual color vectors where one marker is LTR-driven  
232   and the other is driven by a secondary promoter, this approach used a marker expressed from a  
233   secondary promoter to identify productively infected cells, independent of the LTR's  
234   transcription state [32]. However, because puromycin is labile and drug selection was applied  
235   briefly, the analysis here may have included clones for which the entire provirus, including the  
236   internal promoter, was silenced after an initial period of activity. Cell pools infected at differing  
237   multiplicities were analyzed by high throughput sequencing, and a Jurkat pool comprised of  
238   roughly 1,000 zip coded clones was used in subsequent studies.

239           The sequencing of zip codes amplified from duplicate aliquots of this pool's cells  
240   revealed the presence of many zip codes shared in both replicates. However, lower abundance  
241   zip codes were sampled unevenly. To better address the pool's complexity and differential clone  
242   expansion, ten technical replicates made from the pool's genomic DNA were combined to  
243   provide evidence for 706 zip codes, which together accounted for 97.8% of total reads and

244 displayed clonal abundances spanning over two orders of magnitude (Figure 2, Supplementary  
245 Figure 2).

246

247 ***Significant clone-by-clone differences in HIV-1 expression in both Jurkat and primary***  
248 ***cells***

249 Detecting GFP by flow cytometry allowed binary (on/off) monitoring of LTR expression in  
250 individual cells. Portions of the total Jurkat pool, designated Pools 1 and 2, were independently  
251 sorted into GFP positive “GFP+” and negative “GFP-” sub-pools (Figure 3A). The zip code  
252 content of each sub-pool was assessed by high throughput sequencing, to simultaneously  
253 quantify expression characteristics of hundreds of clonal lines (Figure 3). As a control, we also  
254 sorted cells based on their p24 content, using an anti-p24 antibody, and observed a strong  
255 correlation between GFP expression and p24 content. (Supplementary Figure 3).

256 An expression value termed the “GFP+ proportion” was determined for each zip coded  
257 clone. GFP+ proportions were calculated by dividing the read frequency of each zip code within  
258 GFP+ sorted cells by the zip code’s summed abundance in both GFP+ and GFP- sorted cells.  
259 To accurately represent zip codes’ prevalence in the total pool, GFP+ and GFP- clone  
260 abundance values were weighted to reflect the proportions of total Pool 1 and 2 cells contained  
261 in GFP+ and GFP- sub-pools. A sample calculation is provided in Materials and Methods.  
262 Consistent with clonal variation in virus release per cell observed in the pilot experiment above,  
263 GFP+ proportions differed significantly among Jurkat cell clones, with individual clones’ GFP+  
264 proportions ranging from >99% to <1%.

265 To better understand if the broad range of GFP+ proportions observed among clones  
266 reflected clone-specific properties or were a result of sampling, we compared data for duplicate  
267 experimental samples, with the GFP+ proportions calculated for each zip code in Pool 1  
268 compared to GFP+ proportions independently determined for Pool 2. As shown in Figure 3B,  
269 when GFP+ proportion data were plotted against each other, most clones displayed similar

270 values, suggesting that each clone possessed a distinct GFP+ proportion that was not defined  
271 by sampling (Spearman  $\rho = 0.474$  for the 688 zip codes detected in each pool). GFP+  
272 proportions were particularly well correlated for the most abundant zip codes (Figure 3C,  
273 Spearman  $\rho = 0.716$  for the 225 zip codes with fractional abundance  $> 0.001$  in the parental  
274 pool), suggesting that at least 200 clones were sufficiently abundant in the total population to be  
275 reproducibly well sampled in repeated sub-pools.

276 Both experiments above were performed with cell lines, where within-experiment  
277 differences in environment and *trans*-acting factors should be minimized [33]. In an initial test of  
278 whether primary cells also displayed integrant-specific differences in our system, CD4+ cells  
279 were isolated from donor blood, stimulated, and transduced with VSV-G pseudotyped zip coded  
280 GPV<sup>-</sup> (Figure 4). A low multiplicity of infection was selected to aid analysis based on the limited  
281 cell divisions that occur after a single round of primary cell stimulation.

282 Six days post infection, the cells were divided into 2 sub-pools and then sorted into GFP-  
283 and GFP+ cell fractions. Genomic DNA was isolated from both sub-pools' cell fractions, and  
284 proviral zip codes were amplified and sequenced. These experiments were performed in the  
285 absence of puromycin selection. Thus, the GFP- fraction included both uninfected cells and  
286 cells containing silent proviruses, and both the first and the second sub-pools displayed very low  
287 levels of GFP+ cells (0.62% and 0.52% respectively). As a result, precise GFP+ proportions  
288 could not be determined because the total infected cell frequency was not measured, and  
289 instead an assumed frequency of 10% GFP- cells was used in Figure 4 calculations, based on  
290 parallel control experiments performed at a higher MOI and with puromycin selection. Note that  
291 this 10% value is on the upper edge of previously reported primary cell values and may reflect  
292 donor-dependent variation or survival of some non-transduced cells [34]. However, although  
293 absolute values would change if true GFP- value were lower than assumed, correlation trends  
294 and their interpretation would not be affected.

295 Consistent with the results observed with 293T and Jurkat cells, sequencing read data  
296 suggested significant differences among primary cell integrants in clonal expansion rates, as  
297 their progeny cells' abundance levels spread over a wide range (Supplementary Figure 4). Due  
298 to the relatively short duration of primary cell propagation, these abundance differences  
299 severely curtailed the number of clones that were sampled sufficiently to meet inclusion criteria  
300 (that the clone was detectable with fractional abundance  $> 0.001$  in each sub-pool).  
301 Nonetheless, when the GFP+ proportions for these primary cell zip codes were calculated for  
302 each independently analyzed sub-pool and values for the two replicate sorts were plotted  
303 against one another (Figure 4), the trends significantly supported the likelihood that provirus-  
304 containing progeny of primary cells differed by clone in their levels of HIV-1 gene expression  
305 (Spearman  $\rho = 0.26$ ).

306

### 307 ***Clones' GFP+ proportions are a stable, heritable phenotype***

308 Longitudinal studies were performed with the zip coded Jurkat pool to monitor GFP+  
309 proportions throughout cell generations. After sampling for sequencing library preparation,  
310 aliquots of the two GFP+ and two GFP- sub-pools analyzed in Figure 3A were passaged  
311 separately for an additional 8 to 9 days, at which time point each of these four pools was again  
312 sorted by FACS (Figure 5). The results showed that the cellular descendants of Pool 1 and Pool  
313 2 GFP+ sub-pools did not all remain GFP+, nor did the descendants of the GFP- sub-pools  
314 remain all GFP-. Instead, some cells from each sub-pool had switched expression phenotypes  
315 during passaging. This suggested that the HIV-1 expression pattern in any individual cell was  
316 not stably inherited by all of its progeny, but that instead expression "flickered" (alternated  
317 between LTR expression and silencing) during cell propagation.

318 Integrant specific, intrinsic rates of expression that are maintained across cell  
319 generations have previously been reported for basal expression from the HIV-1 promoter [13].  
320 To test whether or not the expression patterns studied here also were stable over time, the

321 GFP+ proportions determined for the GFP+ or GFP- pools in the second sort were combined  
322 after weighting to reconstitute the parental pool (Pool 1 or 2 in Figure 3A) proportions. As  
323 described in Materials and Methods for the derivation of GFP+ proportion values, these  
324 adjustments allowed frequencies determined within individual sub-pools to be combined in a  
325 way that accounted for the composition of the original unfractionated population. This was  
326 especially important here, where the first-sort GFP+ sub-pool had been heavily enriched for  
327 cells from clones with high GFP+ proportions, while the first-sort GFP- sub-pools were enriched  
328 for clones with low GFP+ proportions. Consistent with the stable inheritance of clone-specific  
329 intrinsic expression patterns, the data indicated that the weighted GFP+ proportions for each  
330 integrant following the second sort showed a strong correlation with its original GFP+ proportion  
331 (Spearman  $\rho = 0.938$  for Pool 1 and  $0.805$  for Pool 2; Figure 6).

332

### 333 ***Integration site features do not dictate provirus activity***

334 To address whether integration site features affected the viral gene expression patterns  
335 observed here, zip coded provirus integration sites were compared for clones with differing  
336 expression patterns. Integration sites were determined using a linker-mediated nested PCR  
337 strategy applied to genomic DNA from the original Jurkat pool. Primers were designed so that  
338 sequencing reads included U3 resident zip codes. Initial analysis indicated variable rates of  
339 assignment of a single zip code to multiple genomic locations, likely reflecting the formation of  
340 chimeric molecules during PCR [35, 36]. We therefore went on to implement a greedy strategy to  
341 assign genomic locations to each zip code based on the number of independent DNA fragments  
342 (based on unique DNA shear points) and total reads supporting each site. Using this approach,  
343 we assigned a genomic location to each of the 225 high abundance zip codes (Supplementary  
344 Table 2). As expected [37], integrants were substantially enriched for annotated genes and  
345 genes expressed in Jurkat cells (Supplementary Figure 5), with 58% having the same

346 orientation as the intersecting transcript (109 of 188 that intersect with single genes,  $p=0.034$ ,  
347 binomial test).

348 To search for factors that may affect set point expression levels, we assigned each of  
349 the 225 zip codes to one of three classes: those with a GFP+ proportion of at least 0.6 in both  
350 pools ('mostly GFP+'; 157 clones), those with a GFP+ proportion less than 0.4 in both pools  
351 ('mostly GFP-'; 48) and those with mixed levels of GFP expression ('mixed'; 20). Ignoring  
352 integrants that intersect with no genes or with genes having overlapping expression in divergent  
353 directions, we found no orientation preference for the 'mostly GFP+' integrants (65 of 129 with  
354 single intersection have same orientation;  $p=0.99$  binomial test), whereas both the mostly GFP-  
355 and mixed populations were enriched for integration in the same orientation as gene  
356 transcription (30 out of 40;  $p=0.002$  and 15 out of 19;  $p=0.019$ ). The GFP+ proportion of each  
357 integrant had a strong negative correlation with original abundance in the pool (Spearman  $\rho=-$   
358  $0.289$ ,  $p=1.08 \times 10^{-5}$ ).

359 We additionally compared the distance of integrants to enhancer associated (H3K27ac)  
360 and repressive (H3K9me3) chromatin marks previously determined in Jurkat cell lines [38, 39].  
361 Distance to H3K27ac peaks had a negative but non-significant correlation to GFP+ proportion  
362 (Spearman  $\rho=-0.105$ ,  $p=0.118$ ). Distance to existing H3K9me3 repressive marks in Jurkat cells  
363 was also negatively correlated with GFP+ proportion (Spearman  $\rho=-0.195$ ,  $p=0.0034$ ). Thus,  
364 these results conflictingly showed that integrants with higher GFP expression states were on  
365 average closer to both existing repressive and enhancer chromatin marks. Comparing values  
366 across classes revealed the modest nature of these enrichments (Figure 7), with original clonal  
367 abundance and distance to existing H3K9me3 peaks showing a significant difference between  
368 mostly GFP+ and mostly GFP- clones ( $p=0.0046$  and  $p=0.0073$  Mann Whitney U 2-sided test).

369

370 **Discussion**

371 Here, persistence and HIV-1 expression profiles of individual integrant clones were  
372 compared within polyclonal populations using “zip coded” proviruses, each tagged to identify the  
373 genomic neighborhood where the provirus had integrated. The results revealed a complex array  
374 of heritable differences among clones in population sizes and expression characteristics.

375 Marking libraries with randomized sequence tags has been used in many systems  
376 including SIV and HIV-1 [40] [41] [14]. One group reported infectious SIV derivatives barcoded  
377 to track population dynamics during treatment and rebound [41]. Unlike those SIV derivatives  
378 [41], our vectors lacked Env and (except when remobilized by pseudotyping) were limited to  
379 single replication cycles. Barcodes were inserted toward the center of the virus in the SIV work,  
380 while ours were inserted near provirus edges to facilitate integration site determination. Another  
381 group described barcoded HIV-derived vectors called B-HIVE, with barcodes inserted in HIV-1’s  
382 multifunctional 5’ untranslated region. [14]. We chose to leave the 5’ leader region intact  
383 because it modulates HIV-1 expression by specifying nucleosome and transcription factor  
384 binding [9], folds into a finely-balanced equilibrium of RNA elements that regulate RNA fates  
385 [42], and is highly sensitive to mutation [43]. B-HIVE vectors encode LTR-driven GFP but no  
386 virus structural proteins. In contrast, our vectors retained *gag* and *pol*, thus allowing progeny  
387 virus production and the tracking of both virions and cellular nucleic acids. B-HIVE experiments  
388 were performed at a multiplicity of infection of 0.5 and likely included dually infected clones,  
389 while we used a much lower MOI. Additionally, we assessed expression in both unsorted cell  
390 pools and in serial sub-pools sorted for LTR reporter expression, and observed both dynamic  
391 and heritable aspects of clone-specific expression not evident in the B-HIVE work [14].

392 We benchmarked our system using a small (74 clones) pilot study that addressed  
393 replication fidelity. Zip code abundance varied widely in this pool, as did virus release per cell.  
394 Most zip codes lost during the second cycle of replication were significantly less abundant in the  
395 expanded cell pool derived from the first round of infection than those that persisted for the



396 second round of replication, suggesting that population bottlenecks contributed to zip code  
397 extinction. Zip code survival rates suggested a single cycle lethal mutation rate of about 10%.  
398 This is in the range predicted by findings that roughly one in three HIV-1 genomes accumulates  
399 a reverse transcriptase-generated mutation [44]. However, the majority of patients' persistent  
400 proviruses are defective [26, 28]. Thus, our data support the notion that defective proviruses are  
401 likely more abundant *in vivo* due to selective pressures rather than to reverse transcriptase  
402 infidelity [28, 45].

403         Subsequent experiments were performed in Jurkat or primary T cells, using larger zip  
404 code libraries and proviruses with GFP in the *nef* open reading frame. HIV-1 proteins including  
405 Vpr and Env, which kill or inhibit cultured cells, were absent by design [46] [47]. Within the  
406 unsorted polyclonal Jurkat pool, GFP+ cells were more numerous than GFP- cells and virion  
407 release remained robust. As previously demonstrated with similar vectors, populations were  
408 readily separable into GFP+ and GFP- pools [48-50]. GFP+ pools displayed high levels of virion  
409 release while there was a near-absence of virus from GFP- cells. All abundant zip codes were  
410 reproducibly present in both GFP+ and GFP- cell sub-pools, but to widely varying extents. Using  
411 "GFP+ proportion" to represent the fraction of each clone's cells that sorted GFP+, most clones  
412 were either "mostly GFP-" (with GFP+ proportions  $\leq 0.4$ ) or "mostly GFP+" ( $\geq 0.6$ ).

413         Similar to the pilot study, the number of cells per clone in Jurkat and primary CD4+ pools  
414 spanned three orders of magnitude. Although most cells in the unsorted pool were GFP+, many  
415 clones that were mostly GFP+ were comprised of relatively few cells, and the average number  
416 of cells per mostly GFP- Jurkat clone was significantly greater than for mostly GFP+ clones.  
417 This suggests that caution is appropriate when interpreting findings based on latency models  
418 that use GFP reporters and that passage cells until GFP activity largely disappears. Specifically,  
419 our results suggest that some of the apparent increases in latency over time may reflect  
420 outgrowth by clones with low GFP+ proportions rather than proviral silencing [51].

421           The stability of GFP+ proportions over time was addressed by re-sorting GFP+ and  
422 GFP- sub-pools that had been passaged separately. When GFP values from the secondary  
423 sorts were weighted to reconstitute the original pool, the GFP+ proportions for each clone were  
424 remarkably similar over time. Daughter cells did not always adopt a parental phenotype, but  
425 instead “flickered” between GFP+ and GFP-. It is unclear whether the flickering observed here  
426 differs from the mosaic patterns of expression that have been described previously within  
427 individual retroviral vector cell clones. In those studies, intracлонаl expression variegation was  
428 interpreted to indicate integration site-dependent differences in silencing rather than alternating  
429 waves of expression [13, 52].

430           Heritable high levels of variation among HIV-1 integrant clones have been reported  
431 previously; however unlike the flickering we observed, within-clone HIV-1 expression level  
432 variation has appeared relatively narrow using previous approaches [13, 52]. For example, wide  
433 inter-clone variation was reported in the B-HIVE study. However, HIV-1 expression was  
434 quantified as intracellular RNA copies per cell per barcode using an unsorted cell pool, and it  
435 was assumed that every cell within a given clone expressed LTR-driven RNA to the same  
436 extent [14]. In contrast, our results suggest that at least part of the expression differences  
437 among clones reflects that each clone consists of a phenotypic mixture of cells—some that  
438 release virus and others that do not—in heritable clone-specific proportions.

439           What is responsible for the clone-specific stable equilibrium mixture of GFP+ and GFP-  
440 cells within each clone? Intrinsic fluctuations in transcription factor availability and other  
441 stochastic events contribute significantly to gene expression, and can cause genetically identical  
442 cells propagated under uniform conditions to display a spectrum of phenotypes [53]. The  
443 sources, regulatory mechanisms, and implications of this genetic noise are active areas of  
444 investigation [54, 55]. Phenotypic bifurcation for HIV-1 infected cells, in which intrinsic noise in  
445 Tat expression leads to the co-existence within individual integrant clones of some cells that

446 display high levels of expression and others that display essentially none, has previously been  
447 described [56]. Transcriptional bursting from the HIV-1 promoter is a significant source of  
448 stochastic noise [57], the bursting behavior of the export factor Rev may further exacerbate  
449 noise due to Tat [58], and the phase of the cell cycle may also exert influence [59]. These and  
450 other parameters likely contributed to the broad range of GFP+ proportion set points that  
451 differentiated clones here, even though our system was carried out in transformed cells with the  
452 intention of minimizing extrinsic variability [60].

453         The simplest explanation for why each clone adopted a unique GFP+ proportion set  
454 point may be that multiple inputs—some stochastic and others deterministic-- combined in a  
455 clone-intrinsic manner to skew the probability that a given cell would reach the Tat threshold  
456 needed for GFP expression. The deterministic components could in concept be of either host or  
457 viral origin. However, our initial pilot experiment suggests that the principle differences were not  
458 within proviral sequences, but instead of host origin. Specifically, the amount of virus release  
459 per cell differed among zip codes when all cells with the same zip code were progeny of a single  
460 integration event, but virus release per cell was fairly uniform in a second generation when zip  
461 codes were polyclonal.

462         To explore host contributions due to integration site features, virus/host junctions were  
463 sequenced, integration sites determined, and the characteristics of mostly GFP+ and mostly  
464 GFP- clones compared. The results indicated that mostly GFP+ and mostly GFP- clones  
465 differed significantly in proviral orientation relative to host transcription, with mostly GFP+ clones  
466 including similar numbers of proviruses in both the same and opposite orientation as host  
467 transcription but mostly GFP- clones biased toward the same orientation. This may reflect  
468 transcriptional repression, which has been reported for HIV-1 [15 , 61], although one study  
469 reported an opposite orientation bias [62]. We also assessed the correlations between  
470 repressive or activating chromatin marks previously determined in Jurkat cells [38, 39] and

471 observed modest differences in proximity to H3K9me3 marks. However, the role of host cell  
472 features in robustly discriminating latency or viral expression remains unclear. Machine learning  
473 models can differentiate high- and low-expression genes using epigenetic and genetic features  
474 [63]. However, while that problem is comparable to distinguishing expression for integration  
475 sites, such models use many thousands of training examples and tens of epigenetic features,  
476 while our analysis was restricted to hundreds of sites and a small handful of epigenetic features  
477 previously catalogued for Jurkat cells.

478         Speculatively, some component of the observations here may reflect epigenetic marks  
479 introduced at the time of integration: due either to stochastic events or to differences in the  
480 intracellular environment or architecture of specific integration sites. It is generally assumed that  
481 most of the latent reservoir results from the rare infection of activated cells that transition to a  
482 memory state. However, HIV-1 can enter cells at any phase of the cell cycle. Histone biogenesis  
483 is cell cycle dependent [64] and many histone post-translational modifications are faithfully  
484 introduced onto nascent strands at the time of DNA replication. Although all epigenetic marks  
485 appear regenerated within the course of a single cell generation, some marks are copied with  
486 the replication fork while others (including H3K9me3 and H3K27me3) are deposited throughout  
487 the cell cycle [65, 66]. Because HIV can infect dividing or resting T cells, and the cell's chromatin  
488 modification machinery displays cell cycle-dependent regulation, it is possible that integration at  
489 differing phases of the cell cycle results in distinct patterns of chromatin decoration [64, 67, 68].

490         It seems plausible that the HIV-1 expression variation reported here may cause some of  
491 the differences among experimental models for latency [16] and that expression flickering and  
492 differential set points of expression may be a fairly common outcome during the establishment  
493 of polyclonal HIV-1 populations. As such, these properties may contribute to defining the  
494 nascent proviral populations within infected people that are subsequently culled by immune and  
495 other selective pressures. Understanding how patterns of expression that persist compare to the

496 palette of outcomes in the absence of selection may aid efforts to identify HIV-1's epigenetic  
497 havens, and to the design of fruitful strategies for proviral eradication.

498

## 499 **Materials and Methods**

### 500 ***Cell line propagation***

501 293T cells were grown from a master cell bank [69] and Jurkat (Clone E6-1) cells were  
502 obtained from ATCC. Both cell lines were maintained as lab frozen stocks and validated at the  
503 time of study by tandem repeat analysis using the Applied Biosystems AmpFLSTR™  
504 Identifiler™ Plus PCR Amplification Kit (Thermo Fisher Scientific, Carlsbad, CA). Jurkat cells  
505 were cultured in RPMI supplemented with 10% FBS (Gemini), 100 U/mL penicillin, 100 µg/mL  
506 streptomycin, 2mM glutamine and 55µM β-mercaptoethanol at  $1 \times 10^6$  cell/ml, while Human  
507 Embryonic Kidney (HEK) 293 T cells were grown in DMEM supplemented with 10% FBS  
508 (Gemini) and 125 µM gentamycin. Both cell lines were maintained in a 37°C incubator  
509 containing 5% CO<sub>2</sub>.

510

### 511 ***Construction of zip coded vectors***

512 All HIV-1 vectors were templated by derivatives of the NL4-3 strain plasmid NL4-3 GPP  
513 [70] or by HIV-GPV<sup>-</sup>, which was derived from the GKO [25] provided by Emilie Battivelli and Eric  
514 Verdin (University of California San Francisco). HIV-GPV<sup>-</sup> was constructed by replacing mKO2  
515 in GKO with the puromycin resistance gene from NL4-3 GPP. After initial work with standard  
516 two-LTR vectors, including the pilot fidelity study described here, subsequent zip coded vector  
517 preparation used single LTR versions of these vectors. For this, both vectors were modified into  
518 single “inside out” LTR forms containing the 5' terminal 49 bases of U3 with an engineered Cla I  
519 site plus a second unique site (either Xho I or Mlu I) in U3, and inserted into pBR322 as  
520 previously described [71]. To generate zip coded HIV-1 vector templates, the single LTR  
521 plasmid versions of NL4-3 GPP and GPV<sup>-</sup> were digested with ClaI plus Xho I or Mlu I,

522 respectively. The resulting 11.4kb HIV vector-containing fragments free of plasmid backbone  
523 were purified from agarose using QIAquick Gel Extraction Kit (Cat No./ID: 28706 Qiagen,  
524 Germantown, MD). A 304 bp zip code-containing insert fragment pool was generated by PCR  
525 using NL4-3 GPP or GPV<sup>-</sup> as template, Phusion® High-Fidelity DNA Polymerase (New England  
526 Biolabs, Inc., Ipswich, MA), and primers 5'-  
527 GACAAGATATCCTTGATCTGNNNNNNNNNNNNNNNNNNNNNNGCCATCGATGTGGATCTACC  
528 ACACACAAGGC-3' and 5'-  
529 CGGTGCCTGATTAATTAACGCGTGCTCGAGACCTGGAAAAC-3' for GPV<sup>-</sup> and 5'  
530 GTGTGGTAGATCCACATCGATGGCNNNNNNNNNNNNNNNNNNNNNNNCAGATCAAGGATATCT  
531 TGTCTTC-3' and 5'- ATG CCA CGT AAG CGA AAC TCT CTG GAA GGG CTA ATT CAC TCC-  
532 3' for NL4-3 GPP.

533 To generate the uncloned vector template library, the 11.4 kb fragments of GPV<sup>-</sup> or HIV-  
534 GPP were joined with their cognate 304 bp zip coded partial U3 inserts via Gibson Assembly in  
535 a molar ratio of 1:5 per reaction using HiFi DNA assembly mix (New England Biolabs) following  
536 the manufacturer's protocol. The assembled DNA was then cleaned and concentrated using  
537 Zymo Clean and Concentrator-5 kit (SKU D4013 Zymo Research, Irvine, CA), quantified by  
538 Nanodrop (Thermo Fisher Scientific), and used directly in transfections.

539

#### 540 ***Virion production***

541 Fresh monolayers of HEK 293T cells, approximately 70% confluent, were co-transfected  
542 with 3 µg Gibson Assembly product DNA plus 330 ng pHEF-VSV-G using polyethylenimine  
543 (Polysciences, Inc., Warrington, PA) at a ratio of 1 µg total DNA to 4 µg polyethylenimine in  
544 800 µl of 150 mM NaCl [72]. 24 hours post-transfection, DMEM was replaced with 4 ml  
545 RPMI1640 medium with 10% FBS and 1% Pen/strep. Culture supernatant was harvested at 48  
546 hours post-transfection and filtered through a 0.22 µm filter (Fisher Scientific. Cat. No. 09-720-  
547 511). Released virus was quantified using a real-time reverse-transcription PCR assay and

548 normalized for p24 level based on p24 protein values determined in parallel for reference  
549 samples [71]. Zip coded virus stocks were titered by infecting 90% confluent HEK 293 T cells  
550 and selecting in puromycin. Colony forming units per milliliter of viral media as determined on  
551 293T cells was the standard for defining infectious titer in this work.

552

### 553 ***Infection of HEK 293 T and Jurkat cells***

554 The media on 10 cm plates of 90% confluent HEK 293 T cells was replaced with 2000  $\mu$ l  
555 infection mix comprised of the indicated amount of virus-containing medium plus additional  
556 DMEM in 1 mg/ml polybrene, then incubated at 37 °C with 5% CO<sub>2</sub> for 5 hours. After incubation,  
557 the infection mix was replaced with 10 ml of fresh media. Twenty-four hours post-infection, cells  
558 were placed in media containing puromycin at a concentration of 1 $\mu$ g/ml, which was replaced  
559 every three days for 2 weeks. Following this, colonies were individually cloned, pooled together  
560 for subsequent experiments, or stained with crystal violet and counted.

561 For Jurkat cell infections, virus-containing media and polybrene at a final concentration  
562 of 0.5 mg/ml were brought to a total volume of 1000  $\mu$ l. This infection mixture was added to 1.5  
563 x 10<sup>6</sup> Jurkat cells and incubated in one well of a 12 well tissue culture plate (Fisher Scientific,  
564 Cat. 150628) at 37 °C with 5% CO<sub>2</sub> for 5 hours. Infected cells were then transferred to  
565 Eppendorf tubes and centrifuged for 5 minutes at 2500 rpm at 4°C. Following centrifugation,  
566 supernatants were replaced with fresh media and cell pellets were resuspended and cultured at  
567 37 °C with 5% CO<sub>2</sub>. At 24 hours post-infection, puromycin was added to a final concentration of  
568 0.5  $\mu$ g/ml. The infected cells were expanded into 6 cm culture plates on day 5. Ten days post-  
569 infection, the culture supernatant was replaced with fresh media and the cultures were divided  
570 into aliquots, to be either frozen or further expanded for subsequent experiments.

571

### 572 ***Primary T cell isolation and infection***

573 Peripheral blood mononuclear cells (PBMCs) were isolated from fresh human blood from  
574 healthy donors provided by the Department of Pathology at the University of Michigan using  
575 Ficoll Histopaque as described earlier [73]. All use of human samples was approved by the  
576 Institutional Review Board at the University of Michigan. Total CD4<sup>+</sup> T cells were then purified  
577 from PBMCs using MACS beads (Miltenyi Biotec Bergisch Gladbach, Germany) as per the  
578 manufacturer's instructions. On day 0, a total of  $5 \times 10^6$  cells were seeded in complete culture  
579 medium composed of RPMI supplemented with 10% FBS, 100 U/mL penicillin, 100 µg/mL  
580 streptomycin, 2mM glutamine and 55µM β-mercaptoethanol at  $1 \times 10^6$  cell/ml. The cells were  
581 stimulated using plate-bound anti-CD3 (5 µg/mL; eBioscience, Thermo Fisher Scientific) and  
582 soluble anti-CD28 (1 µg/mL; eBioscience, Thermo Fisher Scientific) antibodies in the presence  
583 of 50 U/ml IL-2 (PeproTech , Inc., Rocky Hill, NJ). On day 2 of activation, the cells were infected  
584 by spinoculation at 2500 rpm for 90 minutes at 37°C with 125 µL zip coded viral media and 0.4  
585 mg/ml polybrene (Sigma Aldrich, St. Louis, MO) in 2.5 ml of supplemented RPMI. After  
586 spinoculation, media containing virus was replaced with fresh supplemented RPMI and cells  
587 were cultured further and expanded as needed. On day 7 post-activation, cells were harvested  
588 and sorted into GFP<sup>+</sup> and GFP<sup>-</sup> sub-pools by flow cytometry using FACS Aria II (BD  
589 Biosciences, Franklin Lakes, NJ) or iCyt Synergy SY3200 (Sony Biotechnology, San Jose, CA)  
590 cell sorter. A portion ( $2 \times 10^6$  cells) of GFP<sup>-</sup> CD4<sup>+</sup> T cells were subjected to puromycin selection  
591 for another 48 hours using 1ml supplemented RPMI containing IL-2 and 2 µg/ml puromycin and  
592 then harvested for further analysis.

593

#### 594 ***Flow cytometry***

595 For flow cytometry analysis and sorting, Jurkat or primary T cells were suspended in  
596 phosphate buffered saline (PBS) containing 1% FBS (FACS buffer). Dead cells were excluded  
597 in all analyses and sorting experiments using propidium iodide (PI). Intracellular Gag staining  
598 was carried out using a Gag monoclonal antibody conjugated to Phycoerythrin (KC-57 RD1



599 Beckman Coulter).  $1 \times 10^5$  cells from a HIV GPV- zip coded library were washed once with FACS  
600 buffer and fixed with 100  $\mu$ l of BD cytofix for 10 minutes at room temperature in the dark. Cells  
601 were then washed twice with FACS buffer then once with BD perm/wash buffer. Staining was  
602 carried out at a 1:200 dilution of antibody in 1x BD perm buffer. The cells were incubated in the  
603 dark at room temperature for 15 minutes, washed twice, then resuspended in 200  $\mu$ l FACS  
604 buffer. Acquisition was carried out on the FITC channel for GFP and PE channel for Gag. Cell  
605 fluorescence was assessed using FACSCanto II (BD Biosciences) and data were analyzed  
606 using FlowJo software, version 9.9 (FlowJo, LLC., Ashland, Oregon).

607

### 608 ***PCR amplification of zip codes from zip coded cells and virus***

609 Genomic DNA was extracted from zip coded cell libraries using Qiagen DNeasy Blood &  
610 Tissue Kit (Qiagen, Germantown, MD). Zip codes were amplified from 100 ng of genomic DNA  
611 using primers flanking the zip code region (primers: 5'-NNACGAAGACAAGATATCCTTGATC-3'  
612 and 5'-NNTGTGTGGTAGATCCACATCG-3') using Phusion® High-Fidelity DNA Polymerase  
613 (New England Biolabs) in HF Buffer. For zip code amplification, we designed multiple primers  
614 complementary to the template binding site that included two known, random nucleotides at the  
615 5' end for use in separate reactions. By comparing the primers used for amplification and the  
616 nucleotides at the end of each amplicon, we could confirm that PCR cross contamination had  
617 not occurred. Reactions were cycled 26-35 times with 30 second extension at 72<sup>o</sup> and a 59<sup>o</sup>  
618 annealing temperature. Zip coded amplicons were purified with DNA Clean & Concentrator-5  
619 (Zymo Research, CA. Cat. No. D4013) and eluted in 20 $\mu$ l of H<sub>2</sub>O. To amplify zip codes from  
620 virus, virus-containing media was filtered through a 0.22  $\mu$ m filter, concentrated by  
621 ultracentrifugation at 25,000 rpm through a 20% sucrose cushion, and RNA extracted with  
622 Invitrogen TRIzol Reagent (Thermo Fisher Scientific). The dissolved RNA was treated with RQ1  
623 DNase (Promega, Fitchburg, WI) to remove possible DNA traces, re-extracted with phenol-  
624 chloroform, and stored at -80 °C. cDNA was synthesized using M-MLV RT (H-) (Promega) and

625 U3 antisense primer 5'-TGTGTGGTAGATCCACATCG-3'. Zip codes were amplified from this  
626 cDNA using conditions outlined above.

627 For library construction, protocols and reagents from NEBNext® Ultra™ DNA Library  
628 Prep Kit for Illumina® (New England Biolabs) were used for end repair, dA-tailing, and to ligate  
629 Nextflex adapters (Perkin Elmer, Waltham, MA) onto amplicons. After ligation, reactions were  
630 diluted up to 100 µl with H<sub>2</sub>O, purified with 0.85x SPRIselect beads, washed twice in 70%  
631 ethanol, and eluted into H<sub>2</sub>O. PCR enrichment of adapter-ligated amplicons was done for 7  
632 cycles using NEBNext® Ultra™ DNA Library Prep Kit, reactions were diluted up to 100 µl with  
633 H<sub>2</sub>O, and purified with 0.85x SPRIselect beads (Beckman Coulter) as outlined above. Libraries  
634 were quantitated with KAPA Library Quantification Kits for Next-Generation Sequencing (Roche  
635 Sequencing Solutions, Inc., Pleasanton, CA) and Qubit™ dsDNA HS Assay Kit (Thermo Fisher  
636 Scientific), pooled equally, and sequenced with MiSeq Reagent Kit v3, 150 cycle PE on MiSeq  
637 sequencer (Illumina, San Diego, CA).

638

### 639 ***Calculating GFP+ proportions***

640 GFP+ proportions were calculated by dividing the read frequency of each zip code within  
641 GFP+ sorted cells by the zip code's summed abundance in both GFP+ and GFP- sorted cells,  
642 after weighting values to reflect the GFP+ and GFP- sub-pools' fractions of total cells. For  
643 example, a clone's GFP+ read frequency would be the proportion of GFP+ total reads that  
644 contained that clone's zip code. If the total pool was 75% GFP+ and 25% GFP- cells, a clone's  
645 weighted abundance would be three times its abundance in GFP+ cells plus its abundance in  
646 GFP- cells. Thus, if a given zip code were 2% of the GFP+ cells and 3% of the GFP- cells within  
647 a 75% GFP+/25% GFP- total pool, its GFP+ proportion would be 2% divided by [(3 x 2%) + 3%]  
648 or 22%.

649

650 ***HIV integration-site sequencing***

651           Template for hemi-specific ligation mediated PCR of insertion sites was obtained by  
652 linear PCR and biotin enrichment of sheared, genomic DNA with linkers ligated on each end.  
653 Linker was synthesized by mixing oligo 5'-  
654 GTAATACGACTCACTATAGGGCTCCGCTTAAGGGACT-3' and 5'-PO4-  
655 GTCCCTTAAGCGGAG-3'-C6 [74] at a final concentration of 40  $\mu$ M each in 100  $\mu$ l volume.  
656 Oligo mixture was heated in PCR block for 5 minutes at 95°C, PCR machine was immediately  
657 shut off, and block was allowed to cool for 2 hours to room temperature. Genomic DNA was  
658 extracted from cells using Qiagen DNeasy Blood & Tissue kit (Qiagen) and 200 ng of DNA was  
659 sheared to 1 kb fragments using Covaris M220 and micro-TUBE according to manufacturer's  
660 recommended settings (Covaris, Woburn, MA). Sheared DNA was purified with 1x SPRIselect  
661 beads according to manufacturer's instructions (Beckman Coulter) and sheared ends were  
662 repaired with NEBNext® Ultra™ End Repair/dA-Tailing Module (New England Biolabs)  
663 according to manufacturer's protocol. Repaired, dA-tailed DNA was purified with 0.7x  
664 SPRIselect beads (Beckman Coulter) and the partially double stranded DNA linker with dT  
665 overhang was ligated in a 60  $\mu$ l reaction containing 6ul of 10X T4 DNA Ligase Buffer, 1.33  $\mu$ M  
666 linker DNA, and 3600U Ultrapure T4 DNA ligase (Qiagen) at 16°C for 16 hours followed by 70°C  
667 incubation for 10 minutes. Ligated DNA was purified with 0.7 x SPRIselect beads (Beckman  
668 Coulter) and used for template in linear PCR reaction containing 1x Expand Long Range Buffer,  
669 500  $\mu$ M dNTPs, 3% DMSO, 3.5U Long Range Enzyme Mix, and a 500  $\mu$ M biotinylated primer  
670 that anneals to the HIV LTR in our construct, 5'- /52-  
671 Bio/CAAAGGTCAGTGGATATCTGACCCC-3'. Cycling parameters were 95°C for 5 minutes, 40  
672 cycles of 95°C for 45 seconds, 60°C for 1 minute, and 68°C for 1.5 minutes, followed by a 10  
673 minutes incubation at 68°C. PCR product was purified with 1x SPRIselect beads (Beckman  
674 Coulter), resuspended in 20  $\mu$ l H<sub>2</sub>O, and biotinylated fragments were captured using

675 Dynabeads kilobase BINDER kit (Thermo Fisher Scientific) according to manufacturer's  
676 instructions. DNA captured by beads was used as template in a hemi-specific PCR reaction  
677 containing 1x Expand Long Range Buffer, 500  $\mu$ M dNTPs, 3% DMSO, 3.5U Long Range  
678 Enzyme Mix, 500  $\mu$ M of a nested primer that anneals to HIV LTR in our construct, 5'-  
679 GCCAATCAGGGAAGTAGCCTTGTGTGTGG-3', and 500  $\mu$ M of a primer that anneals to the  
680 linker, 5'-AGGGCTCCGCTTAAGGGAC-3'. Cycling parameters were 95<sup>0</sup> C for 5 minutes, 30  
681 cycles of 95<sup>0</sup> C for 45 seconds, 60<sup>0</sup> C for 1 minute, and 68<sup>0</sup> C for 1.5 minutes, followed by 10  
682 minutes' incubation at 68<sup>0</sup> C. PCR product was purified with 0.7x SPRIselect beads (Beckman  
683 Coulter), then protocol and reagents from NEBNext<sup>®</sup> Ultra<sup>™</sup> DNA Library Prep Kit for Illumina  
684 (New England Biolabs) were used to end repair, dA-tail, and ligate Nextflex sequencing  
685 adapters (Perkin Elmer) onto amplicons. Ligation reaction was purified with 0.65x SPRIselect  
686 beads (Beckman Coulter) and 7 cycles of PCR to enrich for ligated product was done with  
687 NEBNext<sup>®</sup> Ultra<sup>™</sup> DNA Library Prep Kit for Illumina (New England Biolabs). Libraries were  
688 quantitated with KAPA Library Quantification Kits for Next-Generation Sequencing (Roche  
689 Sequencing Solutions, Inc., Pleasanton, CA) and Qubit<sup>™</sup> dsDNA HS Assay Kit (Thermo Fisher  
690 Scientific), pooled equally, and sequenced with MiSeq Reagent Kit v3, 600 cycle PE on MiSeq  
691 sequencer (Illumina, San Diego, CA). All generated sequence data has been deposited to the  
692 Sequence Read Archive (SRA) under project accession PRJNA531502

693

#### 694 ***Zip code analysis and quantification***

695 Zip codes were identified and quantified from Illumina sequencing reads using a custom  
696 suite of tools implemented in Python (<https://github.com/KiddLab/hiv-zipcode-tools>). First, 2x75  
697 bp paired reads were merged together using *flash* v1.2.11 [75]. Zip codes were identified by  
698 searching for known flanking sequence (with up to 1 mismatch). Only candidate zip codes with a  
699 length of 17-23 nucleotides were considered and the number of read count for each unique zip

700 code was tabulated. To identify the set of zip codes for further analysis, zip codes families which  
701 account for PCR and sequencing errors were determined by clustering together the observed  
702 unique zip codes. Comparisons among zip codes were calculated using a full Needleman-  
703 Wunch alignment tabulated with a score of +1 for sequence matches, -1 for mismatches, and a  
704 constant gap score of -1. Comparisons with two or fewer mismatches (counting a gap as a  
705 mismatch) were accepted as a match. Using this criteria clusters were then identified. First,  
706 unique zip codes were sorted by abundance. Then, beginning with the most abundant zip code,  
707 each sequence was compared with all of the previous zip codes. If no previous zip code had  
708 two or fewer mismatches that zip code was accepted as a cluster and then the next most  
709 abundant zip code was considered. This process was continued until the first unique zip code  
710 having a match to a more abundant zip code was identified. This defined the set of families for  
711 consideration. Abundance for the families was then determined by assigning unique zip codes  
712 to the most abundant family whose sequence was within 2 mismatches and summing their  
713 associated read counts.

714 In sorting experiments, the GFP+ proportion for each zip code was determined as  $F_i =$   
715  $(G_i * P) / (G_i * P + W_i * Q)$  where  $F_i$  is the GFP+ fraction of zip code  $i$ ,  $G_i$  is the fraction  
716 abundance of zip code  $i$  in the GFP+ sorted pool,  $W_i$  is the fraction abundance of zip code  $i$  in  
717 the GFP- sorted pool,  $P$  is the fraction of cells that sorted into the GFP+ pool and  $Q$  is the  
718 fraction of cells that sorted into the GFP- pool. In the Jurkat pool 1, the initial GFP+ fraction was  
719 0.524 and the initial GFP- fraction was 0.36. Of the GFP+ sort from pool 1 the GFP+ fraction  
720 was 0.887 and the GFP- fraction was 0.079 GFP- while in the GFP- sort from pool 1 the GFP+  
721 fraction was 0.046 and the GFP- fraction was 0.928. In the Jurkat pool 2, the initial GFP+  
722 fraction was 0.518 and the initial GFP- fraction was 0.364. Of the GFP+ sort from pool 2 the  
723 GFP+ fraction was 0.915 and the GFP- fraction was 0.082 GFP- while in the GFP- sort from  
724 pool 2 the GFP+ fraction was 0.063 and the GFP- fraction was 0.923. For primary cell data  
725 analysis, the abundance of each zip codes in the GFP+ and GFP- pools summed, and only

726 those zip codes with summed abundance greater than 0.001 in both replicates were considered,  
727 and a GFP+ fraction of 0.9 and a GFP- fraction of 0.1 were assumed.

728 Analysis of integration sites occurred in two stages. First, read-pairs were analyzed to  
729 identify which read derived from the LTR sequence and which from the genomic linker. Zip code  
730 sequences were extracted from the LTR-derived read based on matches to flanking sequence  
731 in the vector as described above. The linker sequence and LTR sequence flanking the zip code  
732 were removed and the extracted zip code sequence was then associated with the remaining  
733 portion of each read pair. Second, the trimmed read pairs were aligned to a version of the hg19  
734 genome that included the sequence of the utilized HIV vector using bwa mem version 0.7.15.  
735 The resulting alignments were then parsed to identify the shear point (DNA adjacent to where  
736 the linker was ligated) and integration point (the DNA location adjacent to the LTR sequence).  
737 The zip codes were then assigned to previously identified zip code families, and the number of  
738 unique shear points and total reads supporting a integration site for each zip code were  
739 tabulated. Only reads with a mapping quality greater than 10 were considered. A greed  
740 algorithm was then used to associate each zip code with a genomic location. Candidates  
741 assignments were sorted by the number of shear points and total reads in descending order.  
742 The most abundant assignment was taken as the position for the indicated zip code, other  
743 assignments for that zip code were removed, and the process was repeated.

744

#### 745 ***Determination of chromatin marks and expressed genes***

746 Gene annotations were determined based on Ensembl release 75. Jurkat gene  
747 expression data produced by Encode [76] was used (accession ENCSR000BXX), and genes  
748 with TPM counts greater than 5 in both replicated were considered to be expressed. H3K27ac  
749 peaks were identified using data from [38] (GSM1697880 and GSM1697882). Chip-seq and  
750 control data were aligned to hg19 using bwa mem and peaks were identified using macs2 v

751 2.1.0 [77] with the --nomodel option. For H3K9me3 peaks, data from [39] (GSM1603227) were  
752 aligned to hg19 using bwa mem and processed using macs2 without a control sequence set.  
753 For both marks a p value cutoff of  $1 \times 10^{-9}$  was used.

754

755 ***Ethics statement***

756           Peripheral blood mononuclear cells (PBMCs) were isolated from fresh human blood from  
757 healthy donors provided by the Department of Pathology at the University of Michigan. All  
758 samples were anonymized and all use of human samples was approved by the Institutional  
759 Review Board at the University of Michigan

760

761 **References**

762

- 763 1. Finzi, D., et al., *Identification of a reservoir for HIV-1 in patients on highly active*  
764 *antiretroviral therapy*. Science, 1997. **278**(5341): p. 1295-300.
- 765 2. Wong, J.K., et al., *Recovery of replication-competent HIV despite prolonged suppression*  
766 *of plasma viremia*. Science, 1997. **278**(5341): p. 1291-5.
- 767 3. Chun, T.W., et al., *Presence of an inducible HIV-1 latent reservoir during highly active*  
768 *antiretroviral therapy*. Proc Natl Acad Sci U S A, 1997. **94**(24): p. 13193-7.
- 769 4. Archin, N.M., et al., *Administration of vorinostat disrupts HIV-1 latency in patients on*  
770 *antiretroviral therapy*. Nature, 2012. **487**(7408): p. 482-5.
- 771 5. Deeks, S.G., *HIV: Shock and kill*. Nature, 2012. **487**(7408): p. 439-40.
- 772 6. Spivak, A.M. and V. Planelles, *Novel Latency Reversal Agents for HIV-1 Cure*. Annu Rev  
773 Med, 2018. **69**: p. 421-436.
- 774 7. Rasmussen, T.A. and S.R. Lewin, *Shocking HIV out of hiding: where are we with clinical*  
775 *trials of latency reversing agents?* Curr Opin HIV AIDS, 2016. **11**(4): p. 394-401.
- 776 8. Mbonye, U. and J. Karn, *The Molecular Basis for Human Immunodeficiency Virus*  
777 *Latency*. Annu Rev Virol, 2017. **4**(1): p. 261-285.
- 778 9. Ne, E., R.J. Palstra, and T. Mahmoudi, *Transcription: Insights From the HIV-1 Promoter*.  
779 Int Rev Cell Mol Biol, 2018. **335**: p. 191-243.
- 780 10. Kaczmarek, K., A. Morales, and A.J. Henderson, *T Cell Transcription Factors and Their*  
781 *Impact on HIV Expression*. Virology (Auckl), 2013. **2013**(4): p. 41-47.



- 782 11. Verdin, E., P. Paras, Jr., and C. Van Lint, *Chromatin disruption in the promoter of human*  
783 *immunodeficiency virus type 1 during transcriptional activation*. EMBO J, 1993. **12**(8): p.  
784 3249-59.
- 785 12. Schroder, A.R., et al., *HIV-1 integration in the human genome favors active genes and*  
786 *local hotspots*. Cell, 2002. **110**(4): p. 521-9.
- 787 13. Jordan, A., P. Defechereux, and E. Verdin, *The site of HIV-1 integration in the human*  
788 *genome determines basal transcriptional activity and response to Tat transactivation*.  
789 EMBO J, 2001. **20**(7): p. 1726-38.
- 790 14. Chen, H.C., et al., *Position effects influence HIV latency reversal*. Nat Struct Mol Biol,  
791 2017. **24**(1): p. 47-54.
- 792 15. Lewinski, M.K., et al., *Genome-wide analysis of chromosomal features repressing human*  
793 *immunodeficiency virus transcription*. J Virol, 2005. **79**(11): p. 6610-9.
- 794 16. Sherrill-Mix, S., et al., *HIV latency and integration site placement in five cell-based*  
795 *models*. Retrovirology, 2013. **10**: p. 90.
- 796 17. Sunshine, S., et al., *HIV Integration Site Analysis of Cellular Models of HIV Latency with a*  
797 *Probe-Enriched Next-Generation Sequencing Assay*. J Virol, 2016. **90**(9): p. 4511-4519.
- 798 18. Ciuffi, A., et al., *A role for LEDGF/p75 in targeting HIV DNA integration*. Nat Med, 2005.  
799 **11**(12): p. 1287-9.
- 800 19. Wong, R.W., J.I. Mamede, and T.J. Hope, *Impact of Nucleoporin-Mediated Chromatin*  
801 *Localization and Nuclear Architecture on HIV Integration Site Selection*. J Virol, 2015.  
802 **89**(19): p. 9702-5.

- 803 20. Dahabieh, M.S., E. Battivelli, and E. Verdin, *Understanding HIV latency: the road to an*  
804 *HIV cure*. *Annu Rev Med*, 2015. **66**: p. 407-21.
- 805 21. Anderson, E.M. and F. Maldarelli, *The role of integration and clonal expansion in HIV*  
806 *infection: live long and prosper*. *Retrovirology*, 2018. **15**(1): p. 71.
- 807 22. Mullins, J.I. and L.M. Frenkel, *Clonal Expansion of Human Immunodeficiency Virus-*  
808 *Infected Cells and Human Immunodeficiency Virus Persistence During Antiretroviral*  
809 *Therapy*. *J Infect Dis*, 2017. **215**(suppl\_3): p. S119-S127.
- 810 23. Satou, Y., et al., *Dynamics and mechanisms of clonal expansion of HIV-1-infected cells in*  
811 *a humanized mouse model*. *Sci Rep*, 2017. **7**(1): p. 6913.
- 812 24. Ho, Y.C., et al., *Replication-competent noninduced proviruses in the latent reservoir*  
813 *increase barrier to HIV-1 cure*. *Cell*, 2013. **155**(3): p. 540-51.
- 814 25. Battivelli, E., et al., *Distinct chromatin functional states correlate with HIV latency*  
815 *reactivation in infected primary CD4(+) T cells*. *Elife*, 2018. **7**.
- 816 26. Pinzone, M.R., et al., *Longitudinal HIV sequencing reveals reservoir expression leading to*  
817 *decay which is obscured by clonal expansion*. *Nat Commun*, 2019. **10**(1): p. 728.
- 818 27. Wiegand, A., et al., *Single-cell analysis of HIV-1 transcriptional activity reveals expression*  
819 *of proviruses in expanded clones during ART*. *Proc Natl Acad Sci U S A*, 2017. **114**(18): p.  
820 E3659-E3668.
- 821 28. Bruner, K.M., et al., *Defective proviruses rapidly accumulate during acute HIV-1*  
822 *infection*. *Nat Med*, 2016. **22**(9): p. 1043-9.

- 823 29. Pollack, R.A., et al., *Defective HIV-1 Proviruses Are Expressed and Can Be Recognized by*  
824 *Cytotoxic T Lymphocytes, which Shape the Proviral Landscape*. *Cell Host Microbe*, 2017.  
825 **21**(4): p. 494-506 e4.
- 826 30. Lu, K., et al., *NMR detection of structures in the HIV-1 5'-leader RNA that regulate*  
827 *genome packaging*. *Science*, 2011. **334**(6053): p. 242-5.
- 828 31. Nolan-Stevaux, O., et al., *Measurement of Cancer Cell Growth Heterogeneity through*  
829 *Lentiviral Barcoding Identifies Clonal Dominance as a Characteristic of In Vivo Tumor*  
830 *Engraftment*. *PLoS One*, 2013. **8**(6): p. e67316.
- 831 32. Dahabieh, M.S., et al., *A doubly fluorescent HIV-1 reporter shows that the majority of*  
832 *integrated HIV-1 is latent shortly after infection*. *J Virol*, 2013. **87**(8): p. 4716-27.
- 833 33. Chomont, N., et al., *HIV reservoir size and persistence are driven by T cell survival and*  
834 *homeostatic proliferation*. *Nat Med*, 2009. **15**(8): p. 893-900.
- 835 34. Martins, L.J., et al., *Modeling HIV-1 Latency in Primary T Cells Using a Replication-*  
836 *Competent Virus*. *AIDS Res Hum Retroviruses*, 2016. **32**(2): p. 187-93.
- 837 35. Quail, M.A., et al., *A large genome center's improvements to the Illumina sequencing*  
838 *system*. *Nat Methods*, 2008. **5**(12): p. 1005-10.
- 839 36. Kircher, M., S. Sawyer, and M. Meyer, *Double indexing overcomes inaccuracies in*  
840 *multiplex sequencing on the Illumina platform*. *Nucleic Acids Res*, 2012. **40**(1): p. e3.
- 841 37. Serrao, E. and A.N. Engelman, *Sites of retroviral DNA integration: From basic research to*  
842 *clinical applications*. *Crit Rev Biochem Mol Biol*, 2016. **51**(1): p. 26-42.
- 843 38. Hnisz, D., et al., *Activation of proto-oncogenes by disruption of chromosome*  
844 *neighborhoods*. *Science*, 2016. **351**(6280): p. 1454-1458.

- 845 39. Reeder, J.E., et al., *HIV Tat controls RNA Polymerase II and the epigenetic landscape to*  
846 *transcriptionally reprogram target immune cells*. Elife, 2015. **4**.
- 847 40. Mei, J.M., et al., *Identification of Staphylococcus aureus virulence genes in a murine*  
848 *model of bacteraemia using signature-tagged mutagenesis*. Mol Microbiol, 1997. **26**(2):  
849 p. 399-407.
- 850 41. Fennessey, C.M., et al., *Genetically-barcoded SIV facilitates enumeration of rebound*  
851 *variants and estimation of reactivation rates in nonhuman primates following*  
852 *interruption of suppressive antiretroviral therapy*. PLoS Pathog, 2017. **13**(5): p.  
853 e1006359.
- 854 42. Bieniasz, P. and A. Telesnitsky, *Multiple, Switchable Protein:RNA Interactions Regulate*  
855 *Human Immunodeficiency Virus Type 1 Assembly*. Annu Rev Virol, 2018.
- 856 43. Kharytonchyk, S., et al., *Influence of gag and RRE Sequences on HIV-1 RNA Packaging*  
857 *Signal Structure and Function*. J Mol Biol, 2018. **430**(14): p. 2066-2079.
- 858 44. Menendez-Arias, L., *Mutation rates and intrinsic fidelity of retroviral reverse*  
859 *transcriptases*. Viruses, 2009. **1**(3): p. 1137-65.
- 860 45. Finzi, D., S.F. Plaeger, and C.W. Dieffenbach, *Defective virus drives human*  
861 *immunodeficiency virus infection, persistence, and pathogenesis*. Clin Vaccine Immunol,  
862 2006. **13**(7): p. 715-21.
- 863 46. Re, F., et al., *Human immunodeficiency virus type 1 Vpr arrests the cell cycle in G2 by*  
864 *inhibiting the activation of p34cdc2-cyclin B*. J Virol, 1995. **69**(11): p. 6859-64.
- 865 47. Costin, J.M., *Cytopathic mechanisms of HIV-1*. Virol J, 2007. **4**: p. 100.

- 866 48. Carter, C.C., et al., *HIV-1 infects multipotent progenitor cells causing cell death and*  
867 *establishing latent cellular reservoirs*. Nat Med, 2010. **16**(4): p. 446-51.
- 868 49. Hakre, S., et al., *HIV latency: experimental systems and molecular models*. FEMS  
869 Microbiol Rev, 2012. **36**(3): p. 706-16.
- 870 50. Pace, M.J., et al., *HIV reservoirs and latency models*. Virology, 2011. **411**(2): p. 344-54.
- 871 51. Tyagi, M. and F. Romerio, *Models of HIV-1 persistence in the CD4+ T cell compartment:*  
872 *past, present and future*. Curr HIV Res, 2011. **9**(8): p. 579-87.
- 873 52. Zentilin, L., et al., *Variegation of retroviral vector gene expression in myeloid cells*. Gene  
874 Ther, 2000. **7**(2): p. 153-66.
- 875 53. Kaern, M., et al., *Stochasticity in gene expression: from theories to phenotypes*. Nat Rev  
876 Genet, 2005. **6**(6): p. 451-64.
- 877 54. Coulon, A., et al., *Eukaryotic transcriptional dynamics: from single molecules to cell*  
878 *populations*. Nat Rev Genet, 2013. **14**(8): p. 572-84.
- 879 55. Battich, N., T. Stoeger, and L. Pelkmans, *Control of Transcript Variability in Single*  
880 *Mammalian Cells*. Cell, 2015. **163**(7): p. 1596-610.
- 881 56. Weinberger, L.S., et al., *Stochastic gene expression in a lentiviral positive-feedback loop:*  
882 *HIV-1 Tat fluctuations drive phenotypic diversity*. Cell, 2005. **122**(2): p. 169-82.
- 883 57. Singh, A., et al., *Transcriptional bursting from the HIV-1 promoter is a significant source*  
884 *of stochastic noise in HIV-1 gene expression*. Biophys J, 2010. **98**(8): p. L32-4.
- 885 58. Pocock, G.M., et al., *Diverse activities of viral cis-acting RNA regulatory elements*  
886 *revealed using multicolor, long-term, single-cell imaging*. Mol Biol Cell, 2017. **28**(3): p.  
887 476-487.

- 888 59. Kok, Y.L., et al., *Spontaneous reactivation of latent HIV-1 promoters is linked to the cell*  
889 *cycle as revealed by a genetic-insulators-containing dual-fluorescence HIV-1-based*  
890 *vector*. *Sci Rep*, 2018. **8**(1): p. 10204.
- 891 60. Swain, P.S., M.B. Elowitz, and E.D. Siggia, *Intrinsic and extrinsic contributions to*  
892 *stochasticity in gene expression*. *Proc Natl Acad Sci U S A*, 2002. **99**(20): p. 12795-800.
- 893 61. Gallastegui, E., et al., *Chromatin reassembly factors are involved in transcriptional*  
894 *interference promoting HIV latency*. *J Virol*, 2011. **85**(7): p. 3187-202.
- 895 62. Han, Y., et al., *Orientation-dependent regulation of integrated HIV-1 expression by host*  
896 *gene transcriptional readthrough*. *Cell Host Microbe*, 2008. **4**(2): p. 134-46.
- 897 63. Cheng, C., et al., *A statistical framework for modeling gene expression using chromatin*  
898 *features and application to modENCODE datasets*. *Genome Biol*, 2011. **12**(2): p. R15.
- 899 64. Ma, Y., K. Kanakousaki, and L. Buttitta, *How the cell cycle impacts chromatin architecture*  
900 *and influences cell fate*. *Front Genet*, 2015. **6**: p. 19.
- 901 65. Reveron-Gomez, N., et al., *Accurate Recycling of Parental Histones Reproduces the*  
902 *Histone Modification Landscape during DNA Replication*. *Mol Cell*, 2018. **72**(2): p. 239-  
903 249 e5.
- 904 66. Alabert, C., et al., *Two distinct modes for propagation of histone PTMs across the cell*  
905 *cycle*. *Genes Dev*, 2015. **29**(6): p. 585-90.
- 906 67. Chavez, L., V. Calvanese, and E. Verdin, *HIV Latency Is Established Directly and Early in*  
907 *Both Resting and Activated Primary CD4 T Cells*. *PLoS Pathog*, 2015. **11**(6): p. e1004955.
- 908 68. Pace, M.J., et al., *Directly infected resting CD4+T cells can produce HIV Gag without*  
909 *spreading infection in a model of HIV latency*. *PLoS Pathog*, 2012. **8**(7): p. e1002818.

- 910 69. Yang, S., et al., *Generation of retroviral vector for clinical studies using transient*  
911 *transfection*. Hum Gene Ther, 1999. **10**(1): p. 123-32.
- 912 70. Lu, K., et al., *NMR detection of structures in the HIV-1 5'-leader RNA that regulate*  
913 *genome packaging*. Science, 2011. **334**(6053): p. 242-245.
- 914 71. Kharytonchyk, S., et al., *Resolution of Specific Nucleotide Mismatches by Wild-Type and*  
915 *AZT-Resistant Reverse Transcriptases during HIV-1 Replication*. Journal of molecular  
916 biology, 2016. **428**(11): p. 2275-2288.
- 917 72. Keene, S.E., S.R. King, and A. Telesnitsky, *7SL RNA is retained in HIV-1 minimal virus-like*  
918 *particles as an S-domain fragment*. Journal of virology, 2010. **84**(18): p. 9070-9077.
- 919 73. Kim, Y.H., et al., *PLZF-expressing CD4 T cells show the characteristics of terminally*  
920 *differentiated effector memory CD4 T cells in humans*. Eur J Immunol, 2018. **48**(7): p.  
921 1255-1257.
- 922 74. Maldarelli, F., et al., *HIV latency. Specific HIV integration sites are linked to clonal*  
923 *expansion and persistence of infected cells*. Science, 2014. **345**(6193): p. 179-83.
- 924 75. Magoc, T. and S.L. Salzberg, *FLASH: fast length adjustment of short reads to improve*  
925 *genome assemblies*. Bioinformatics, 2011. **27**(21): p. 2957-63.
- 926 76. Consortium, E.P., *An integrated encyclopedia of DNA elements in the human genome*.  
927 Nature, 2012. **489**(7414): p. 57-74.
- 928 77. Zhang, Y., et al., *Model-based analysis of ChIP-Seq (MACS)*. Genome Biol, 2008. **9**(9): p.  
929 R137.
- 930
- 931

## 932 **Figure Legends**

933 **Figure 1. Monitoring proviral replication competence across generations.** A: Schematic  
934 illustrations of the vectors used in this paper. Gold bars represent the sites of randomized  
935 sequence insertions. Features and construction are described in Materials and Methods. B: A  
936 schematic of the experimental flow of the replication competence experiment, depicting the  
937 analysis of genomic DNA and viral cDNA harvested from the F<sub>1</sub> and F<sub>2</sub> generations. C:  
938 Summary of the number of independent zip codes detectable at different stages of the  
939 experiment. A total of 63 zip codes were detected in all four pools. The remainder were only  
940 detected in the indicated stages. D-F: scatter plots of zip code read proportions across indicated  
941 stages of the experiment, as outlined in panel B. Each clone is represented by a single point,  
942 colored to reflect that clone's persistence based upon the progression pattern depicted in panel  
943 C. The Spearman correlation for each comparison is given.

944  
945 **Figure 2. Zip code fractional abundance.** Each of 706 zip code families identified in the Jurkat  
946 pool is depicted by a single point. The clones are arrayed left to right from the most abundant to  
947 the least abundant, with the fractional abundance of total reads assigned to that zip code on the  
948 Y axis.

949  
950 **Figure 3. GFP+ proportions for independent clonal lines within a complex population.** A:  
951 Schematic description of the cell pool splitting and sorting procedures performed. GFP+  
952 proportions were determined as described in the text. B: comparison of fraction GFP+  
953 determined for each zip code in pool 1 and pool 2. Each point represents a single zip coded cell  
954 clone. Individual clones are colored based on their fractional abundance in the original unsorted  
955 pool as indicated by the color bar at the panel's right. C, as in B, but with data for the less  
956 abundant clones removed to show only the 225 zip codes with fractional abundance > 0.001.

957



958 **Figure 4. Reproducibility of GFP+ proportions for individual primary cell clones.** The  
959 GFP+ proportions for 24 zip codes selected as described in the text and detected in two sub-  
960 pools of a primary cell infection were plotted against one another.

961

962 **Figure 5. GFP+ proportions of passaged and re-sorted GFP+ and GFP- cell pools.** A:  
963 Depiction of the cells' passaging and sorting scheme, with the initial sorted pools characterized  
964 in Figure 3 at the top, followed by the re-sorted sub-pools analyzed here. The colored dots next  
965 to each pool correspond to the comparisons plotted in panels B-E. B: Analysis of zip codes that  
966 sorted GFP+ in pool 1. C: Analysis of zip codes that sorted GFP- in pool 1. D: Analysis of zip  
967 codes that sorted GFP+ in pool 2. E: Analysis of zip codes that sorted GFP- in pool 2

968

969 **Figure 6. Stability of GFP+ proportions over time.** GFP+ proportions determined in the first  
970 sort (Figure 3 data) plotted against reconstructed GFP+ proportions for each zip code derived  
971 from data in the second sort (Figure 5). Second sort GFP+ proportions were reconstructed by  
972 weighting the GFP+ and GFP- sub-pool values determined in Figure 5 and combining these to  
973 reconstitute GFP+ proportions for the total pool after extended passage, and these second sort  
974 reconstituted proportions were plotted against experimental values from the first sort.

975

976 **Figure 7. Correlations between GFP+ proportions and specific genomic features.** Each of  
977 the 215 zip codes were binned into one of three categories (mostly GFP+, mostly GFP-, or  
978 mixed, as described in the text). Panel A box plots show the fractional abundance of each zip  
979 code residing in that category of clones, as determined in the original unsorted pool (Figure 2  
980 data). Panels B and C compare distances to H3k27ac and H3k9me3 peaks, respectively, for the  
981 mostly GFP+, mostly GFP-, and mixed expression pattern zip codes. For each boxplot the  
982 median and interquartile range is depicted.

983

984 **Figure S1. Zip code family and read abundance for single cycle experiment.** The blue line  
985 (left axis) shows the number of unique zip code families determined by clustering the indicated  
986 number of unique zip codes. The red line (right axis) show the cumulative fraction of reads  
987 accounted for by each unique zip code.

988

989 **Figure S2. Zip code rank and fractional abundance for Jurkat pool.** Axes are as in Figure  
990 S1.

991

992 **Figure S3. Flow cytometric analysis for the co-occurrence of intracellular Gag staining**  
993 **and GFP.** Performed using Jurkat cells containing zip coded HIV GPV- library as described in  
994 Materials and Methods. Numbers in each quadrant indicate the proportion of total cells in that  
995 quadrant.

996

997 **Figure S4. Observed abundances for zip codes from primary cells infections.** The Y axis  
998 shows the mean fractional abundance for each zip code across the two parallel sub-pools.

999

1000 **Figure S5. Enrichment of integrants in annotated genes (left) and genes expressed in**  
1001 **Jurkat cells (right).** Observed intersections compared with random placements. In each figure  
1002 the red line indicates the observed values for the 225 integrants determined in the Jurkat cells  
1003 and the blue histogram indicates the counts observed from 1,000 random permutations.

1004

1005

A

NL4-3 GPP

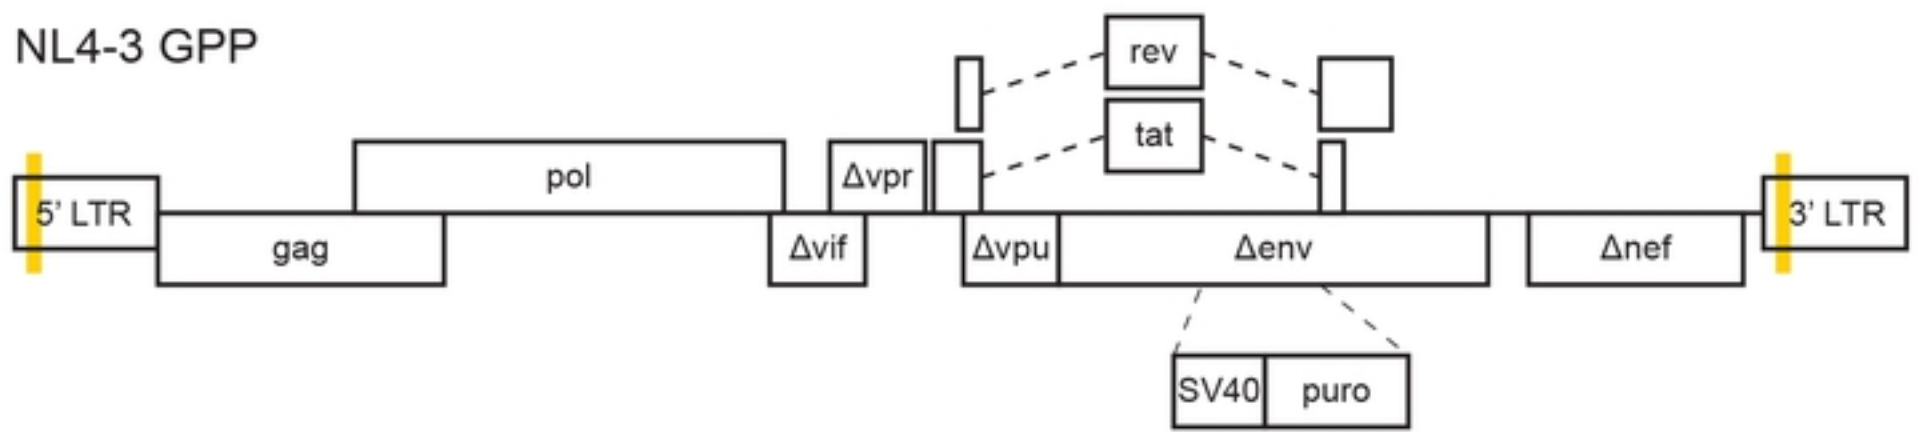HIV-GPV<sup>-</sup>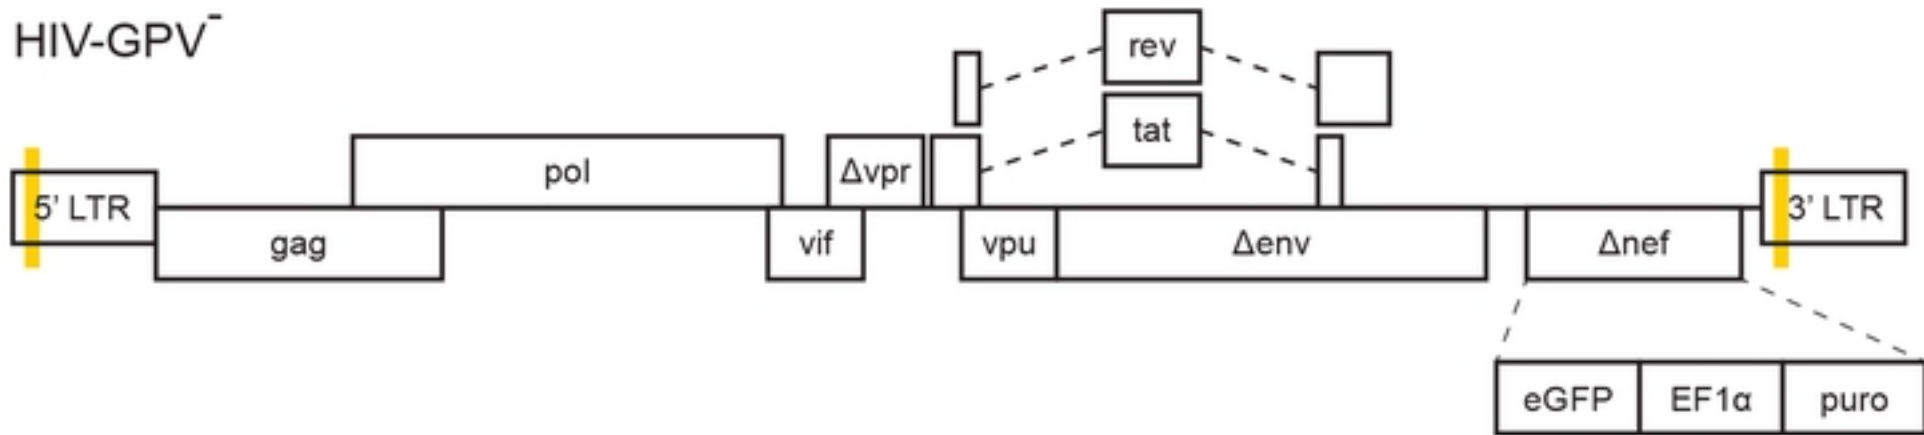

B

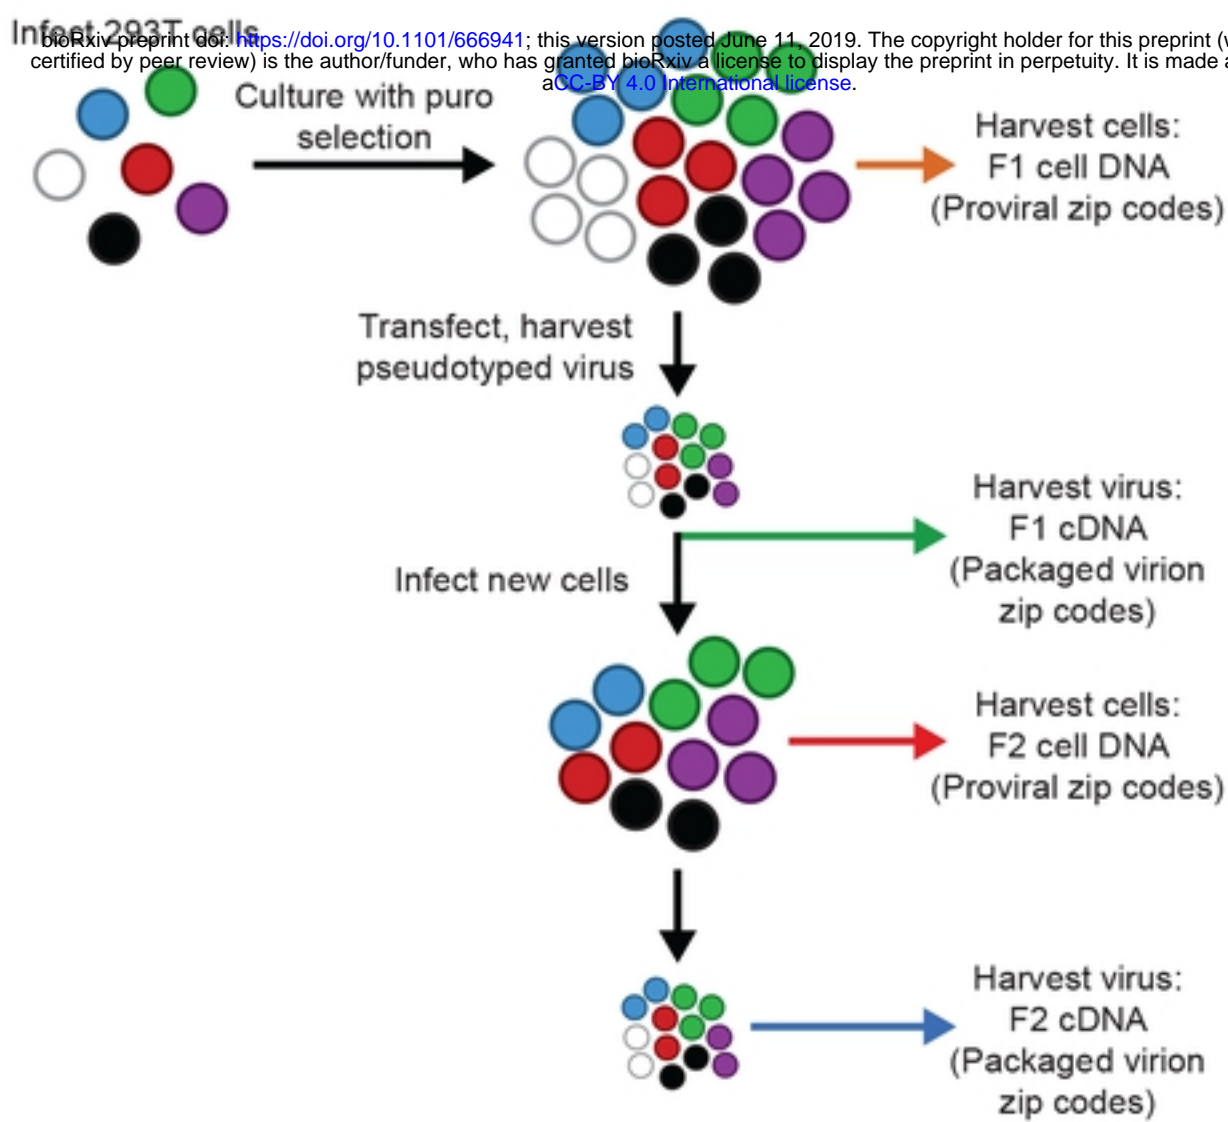

C

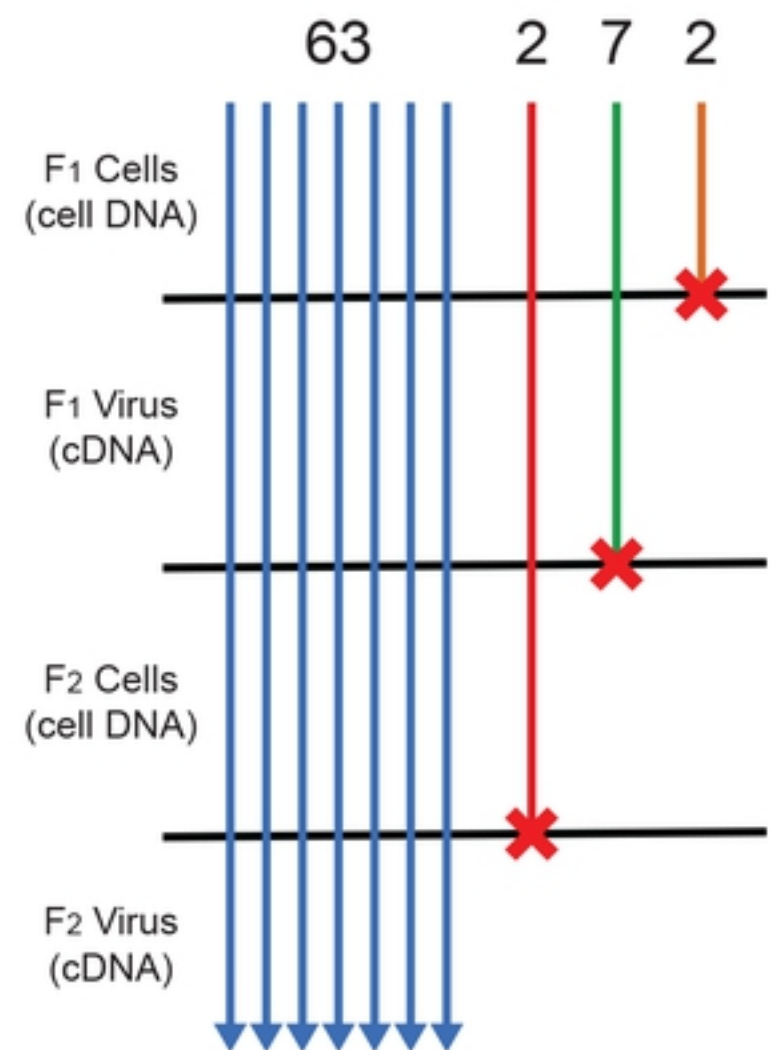

D

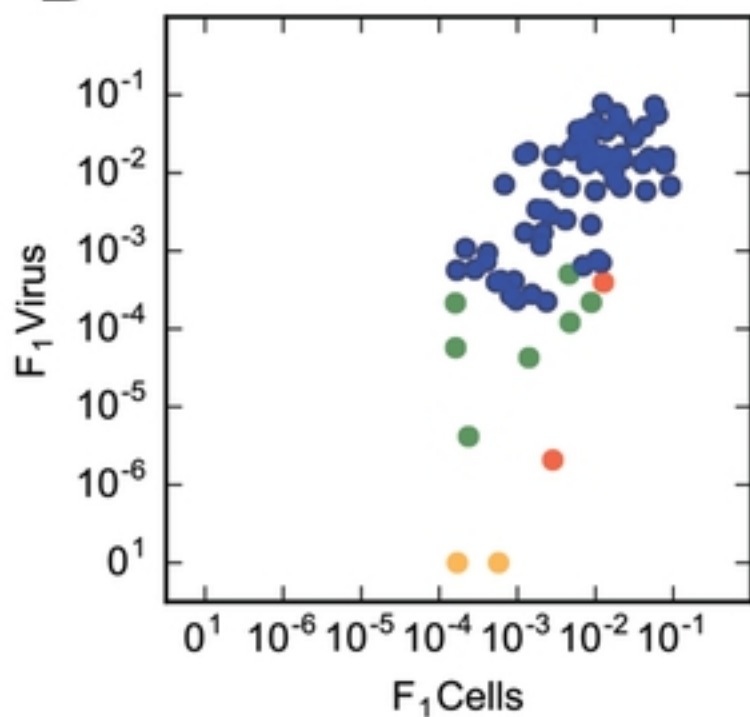

E

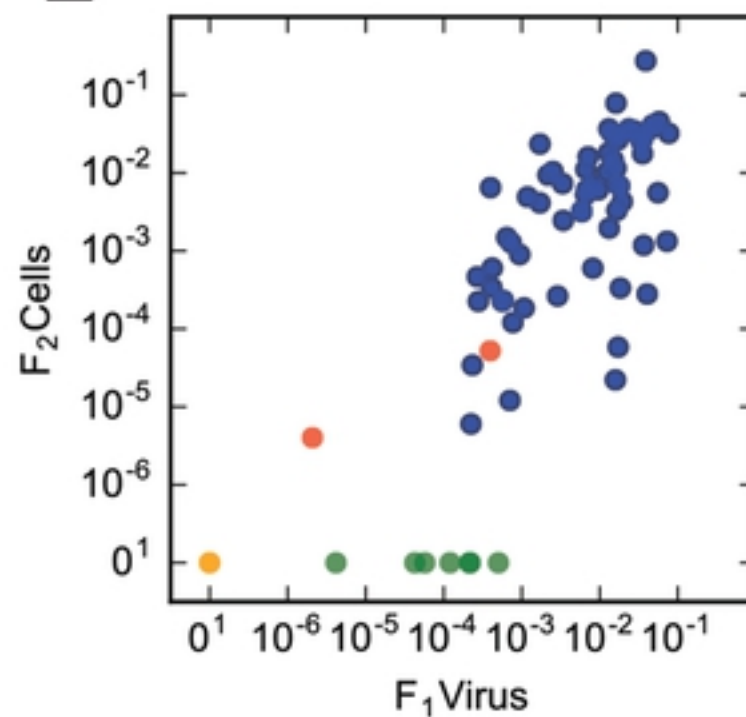

F

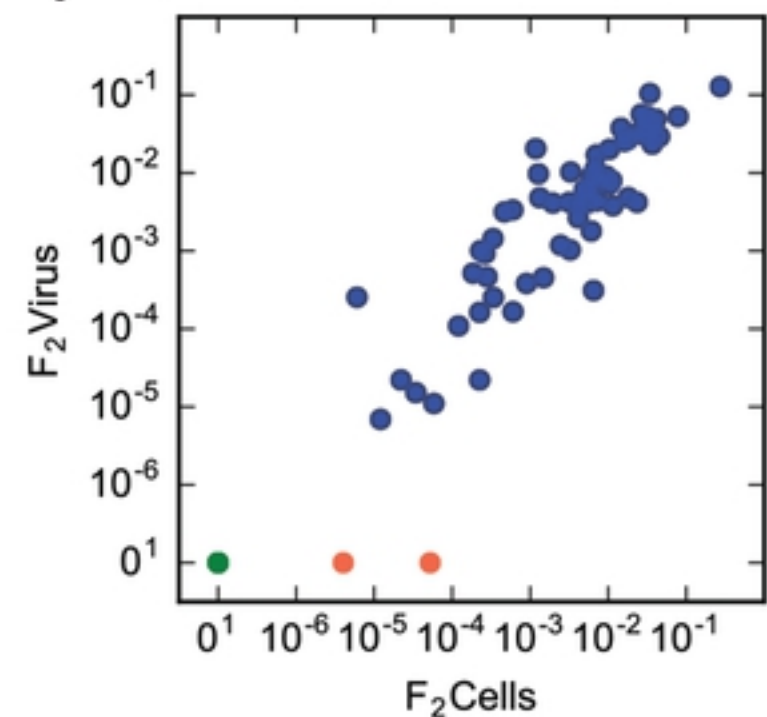

Fig1

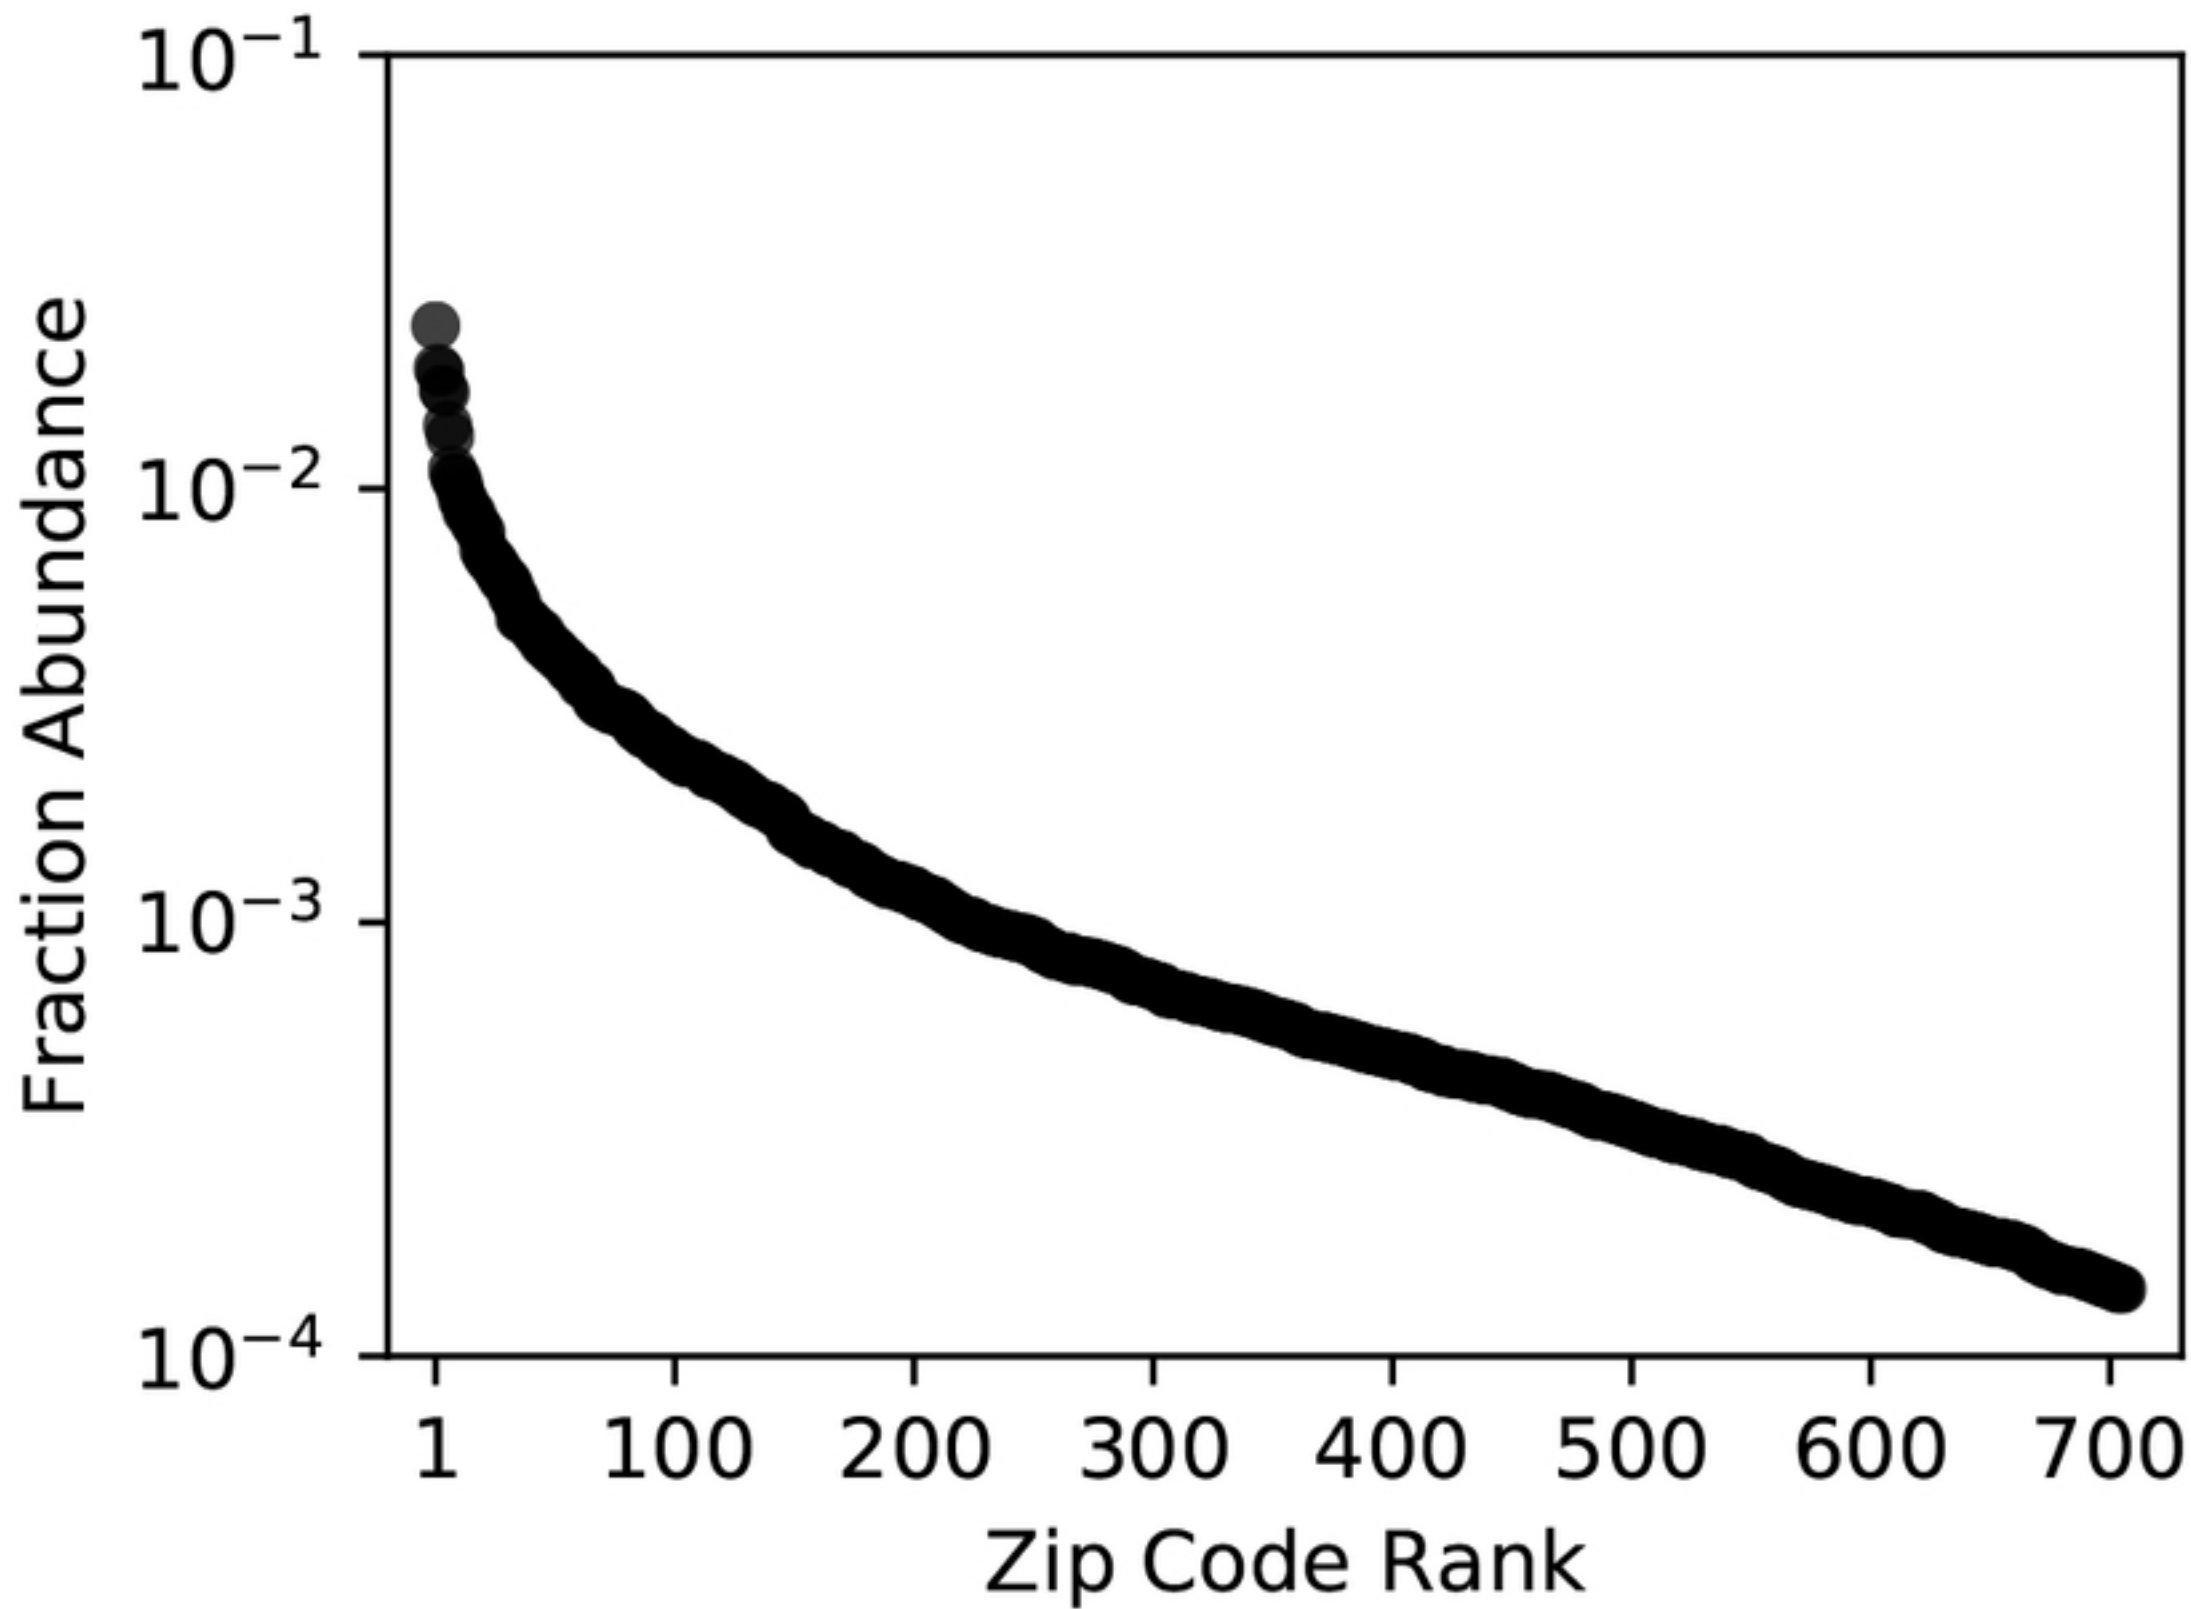

Fig2

A

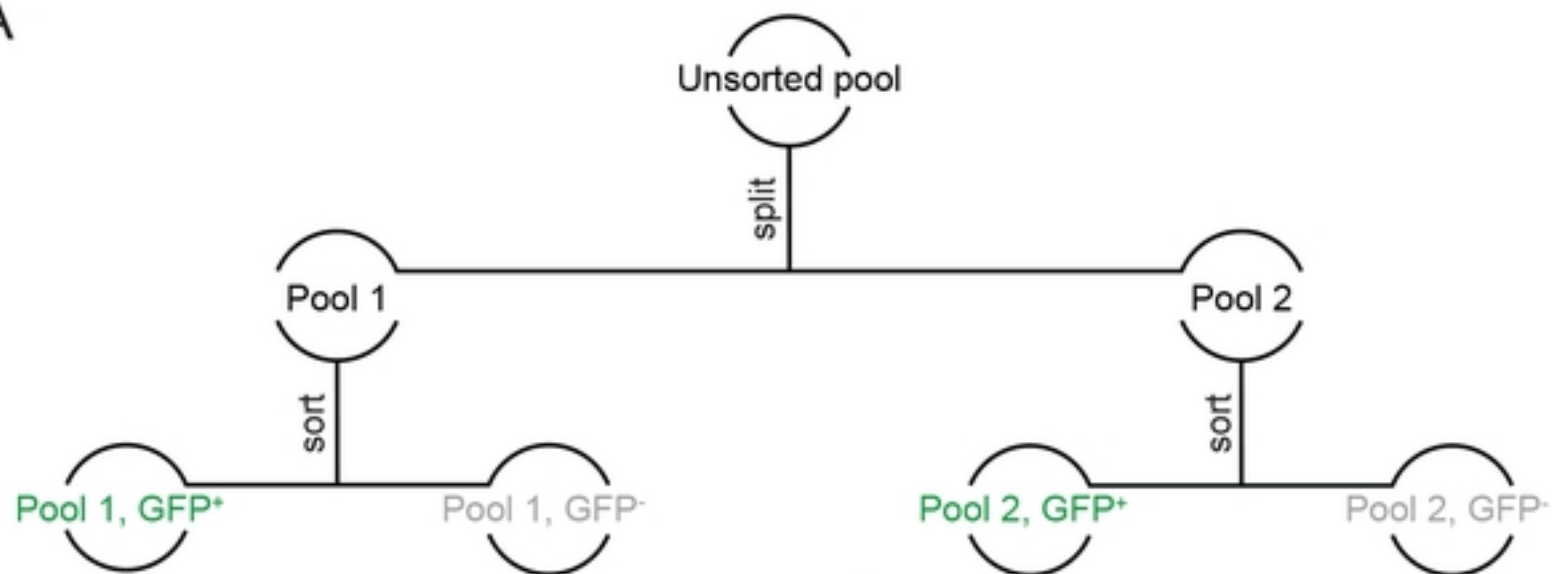

B

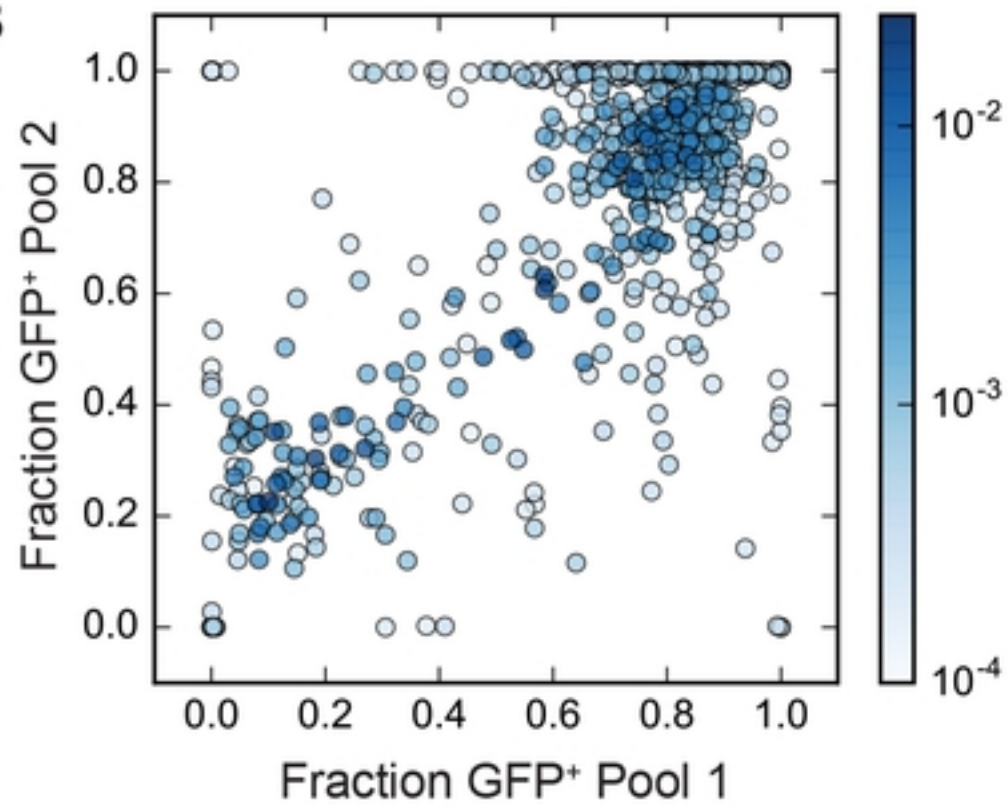

C

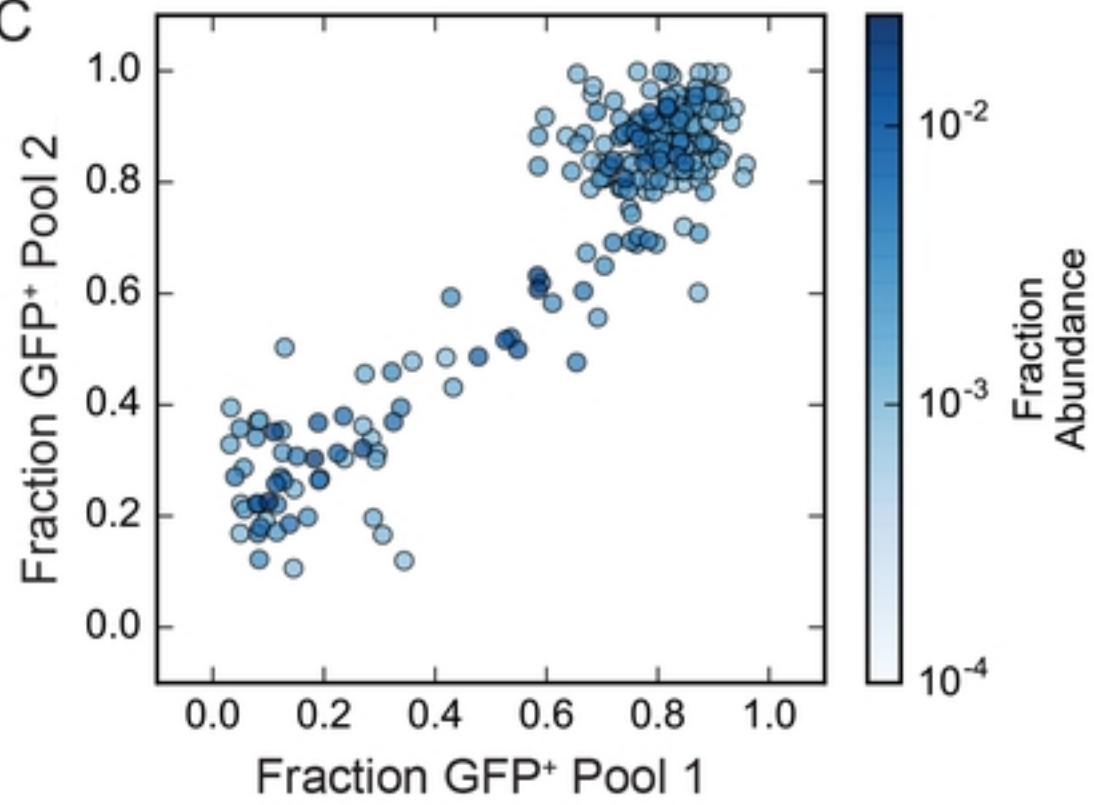

Fig3

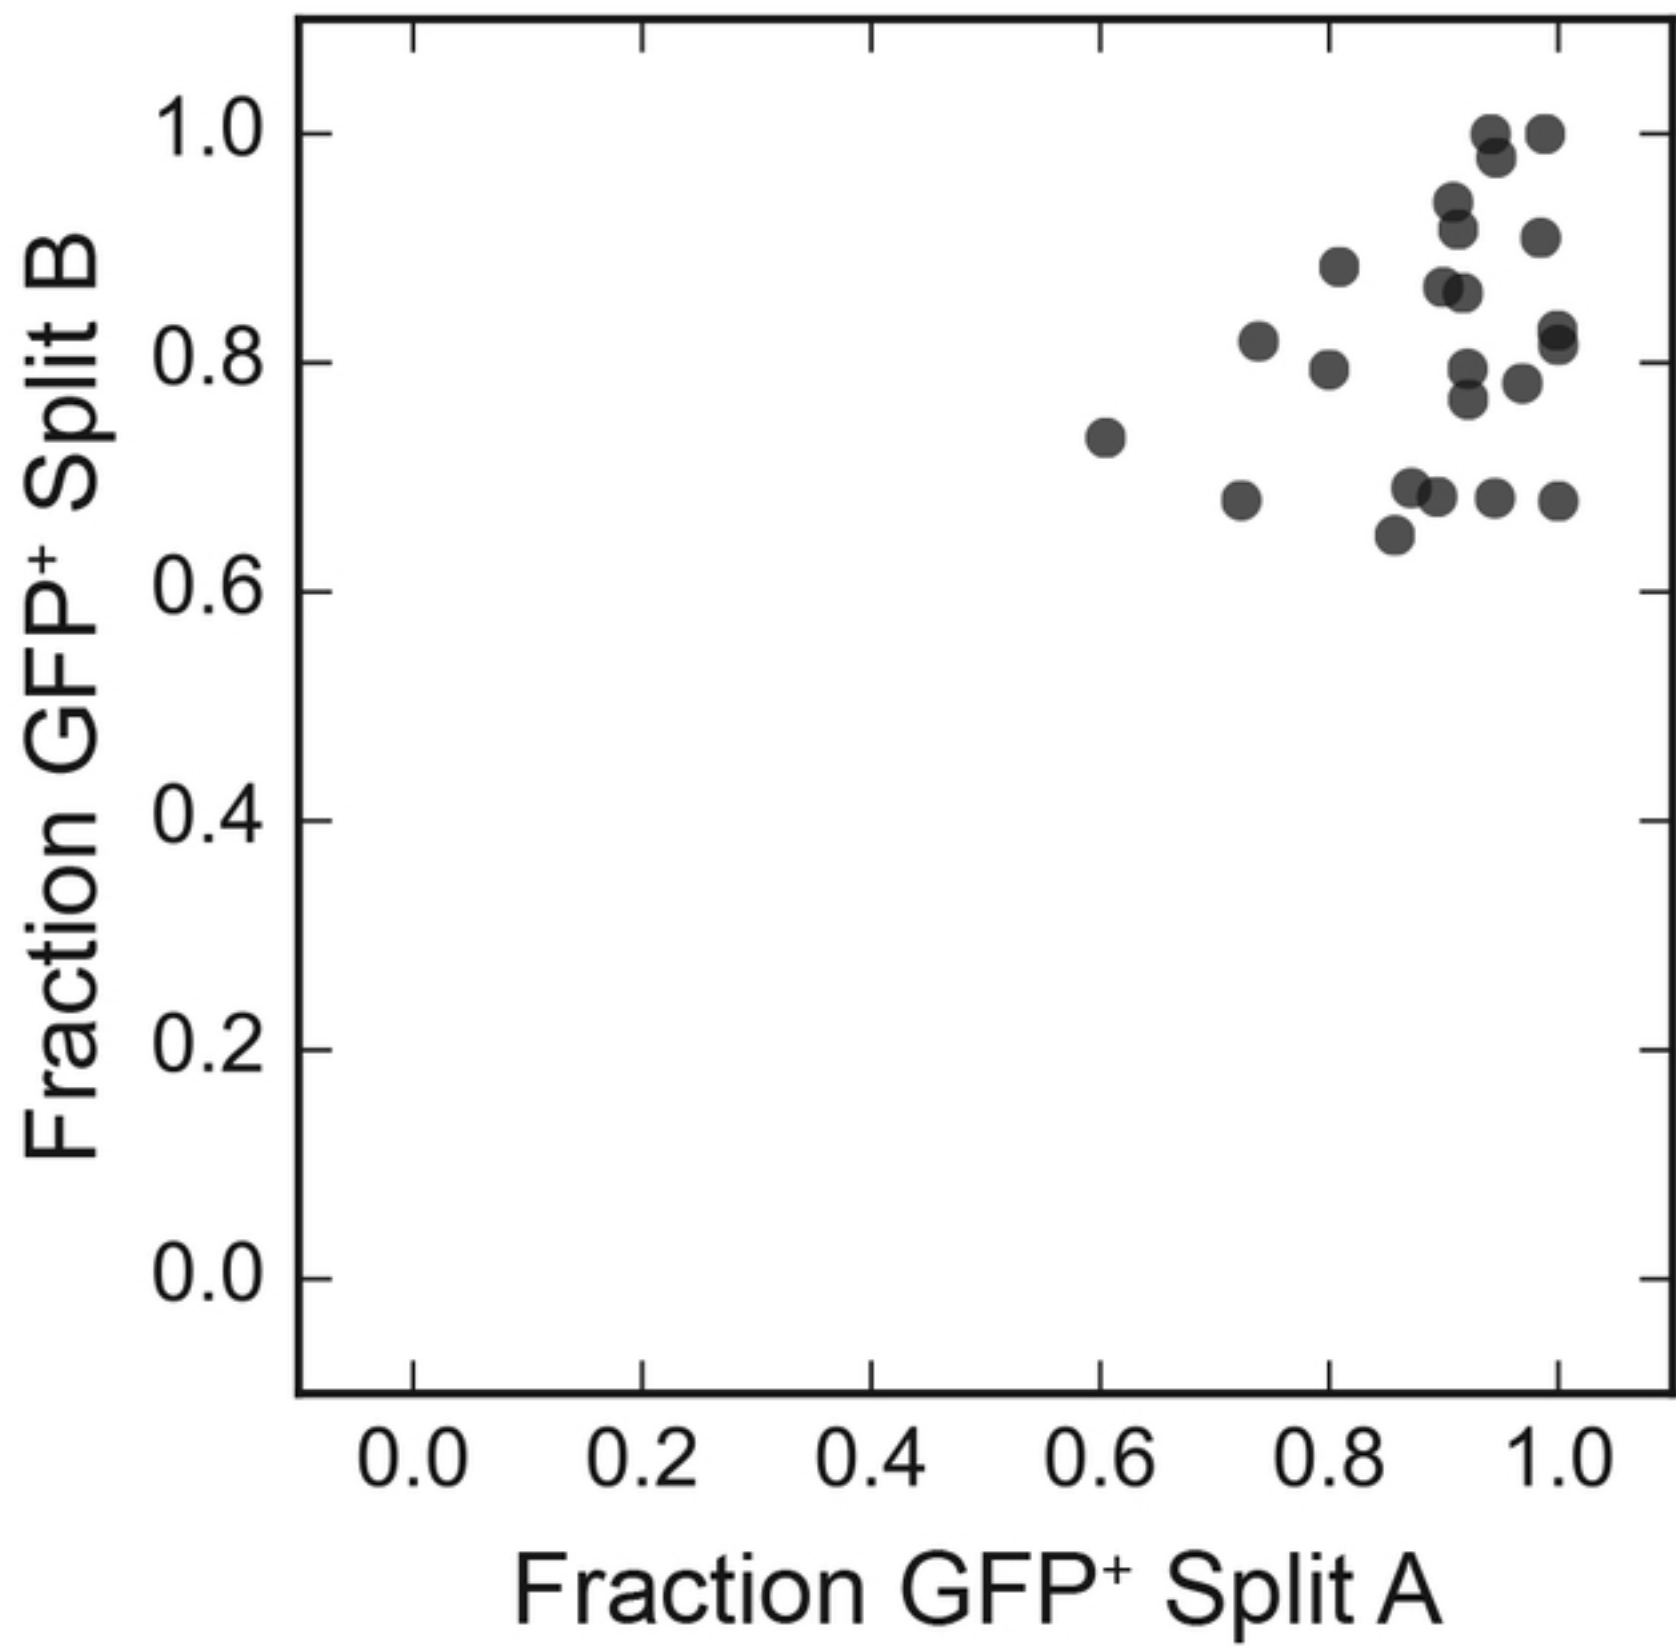

Fig4

A

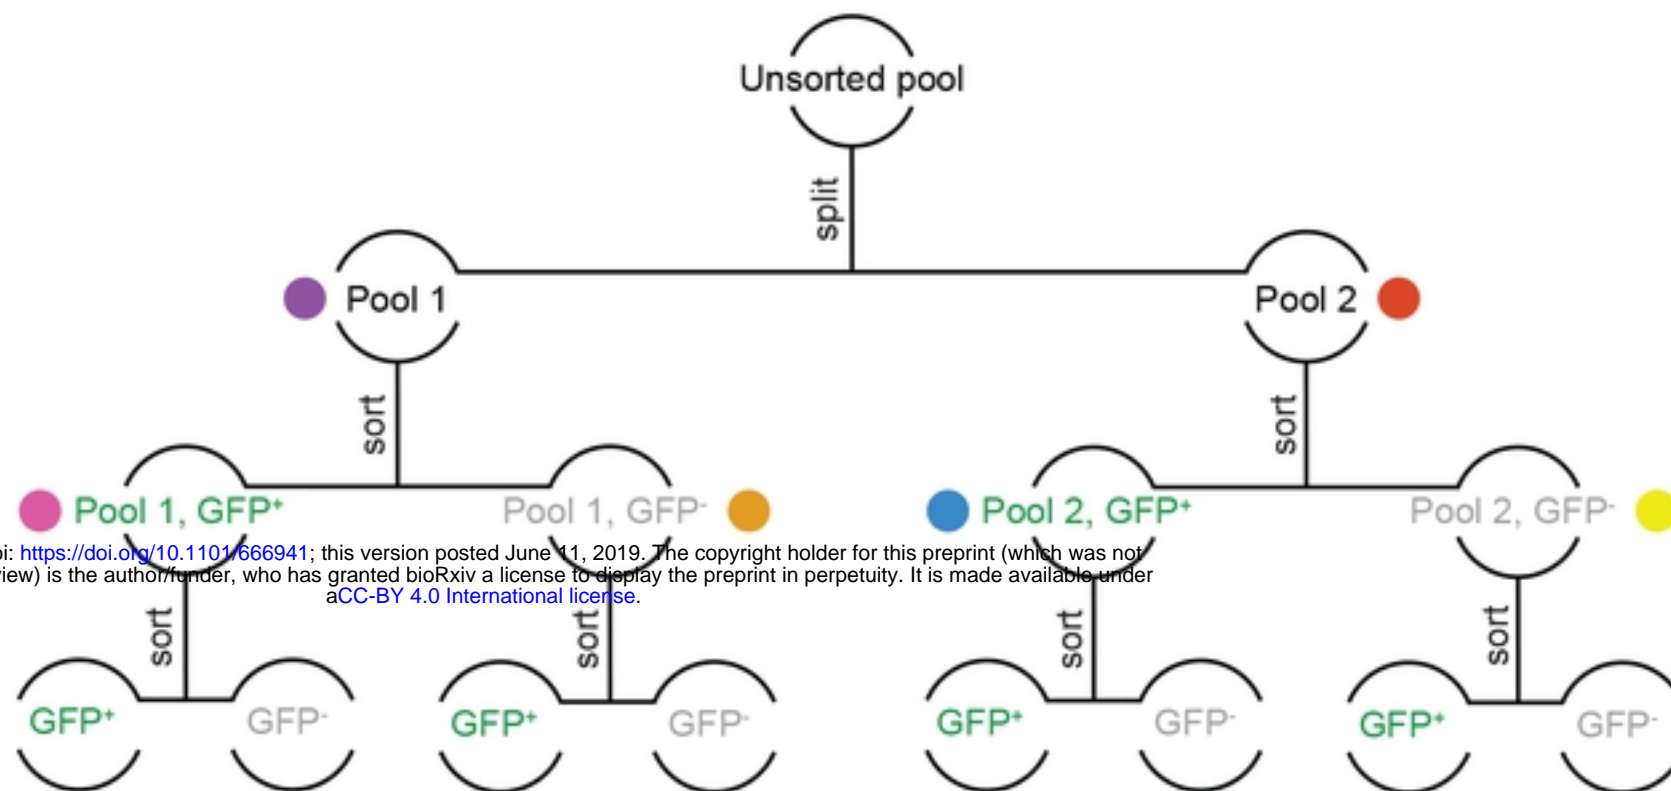

bioRxiv preprint doi: <https://doi.org/10.1101/666941>; this version posted June 11, 2019. The copyright holder for this preprint (which was not certified by peer review) is the author/funder, who has granted bioRxiv a license to display the preprint in perpetuity. It is made available under aCC-BY 4.0 International license.

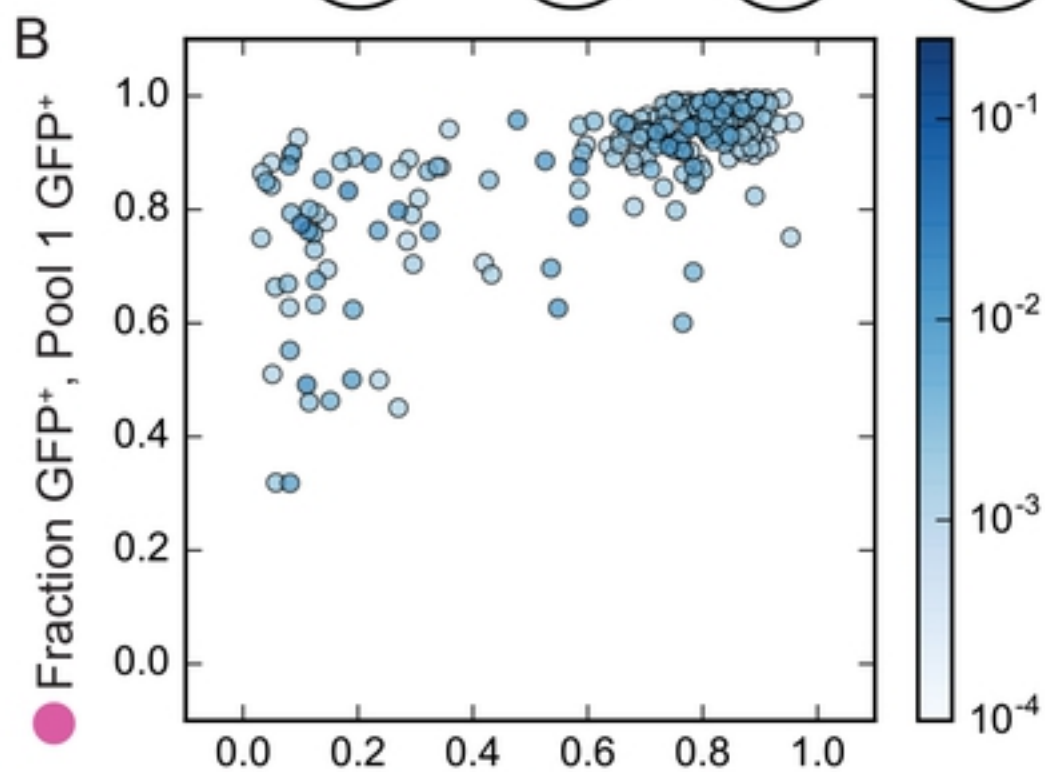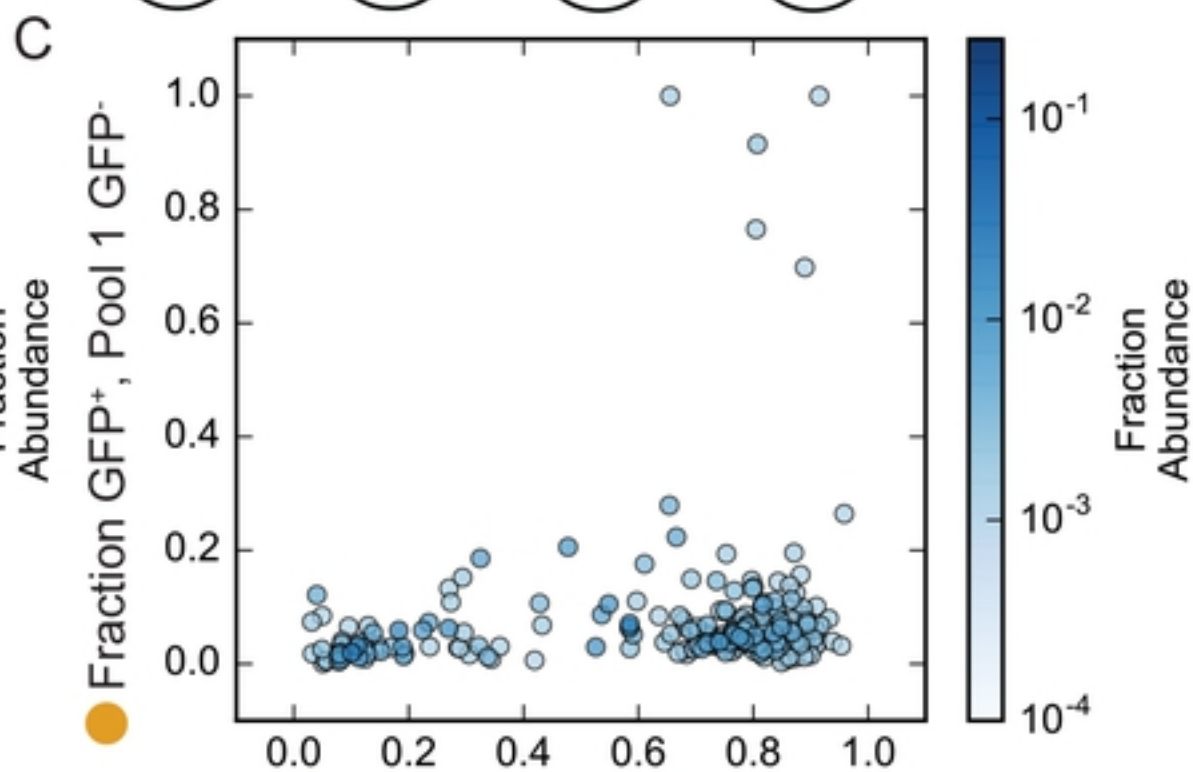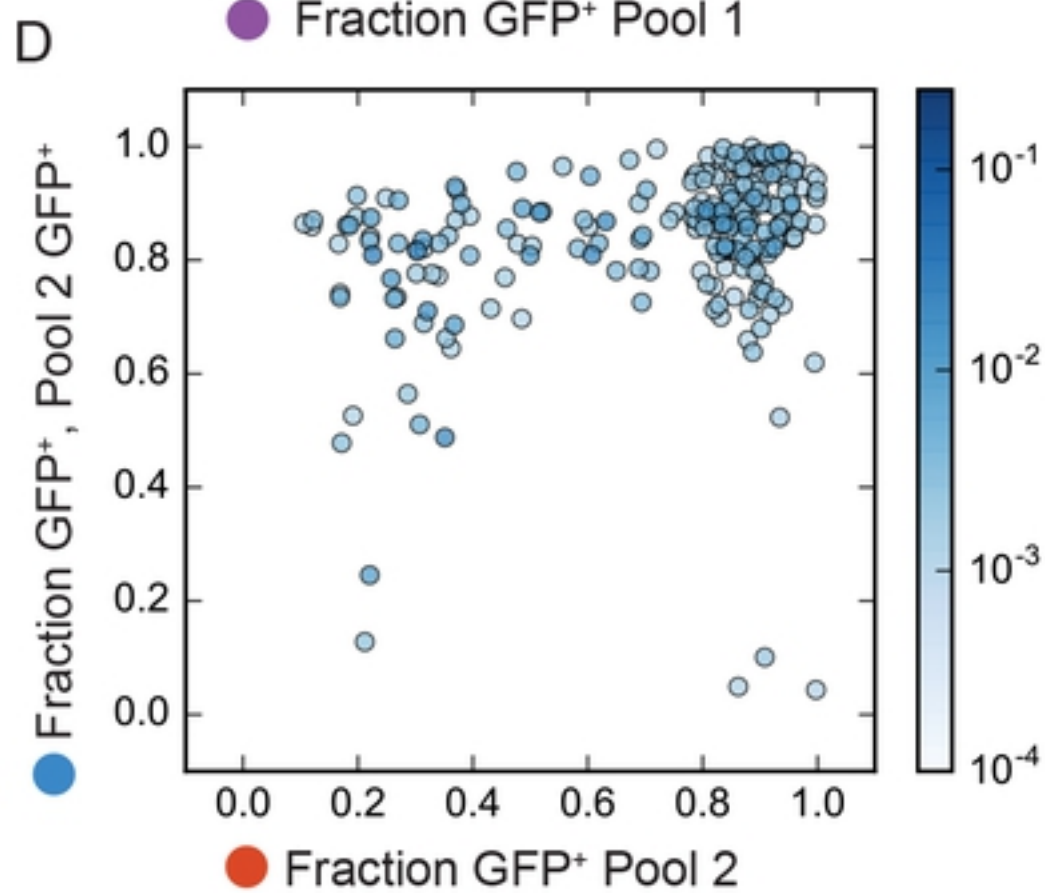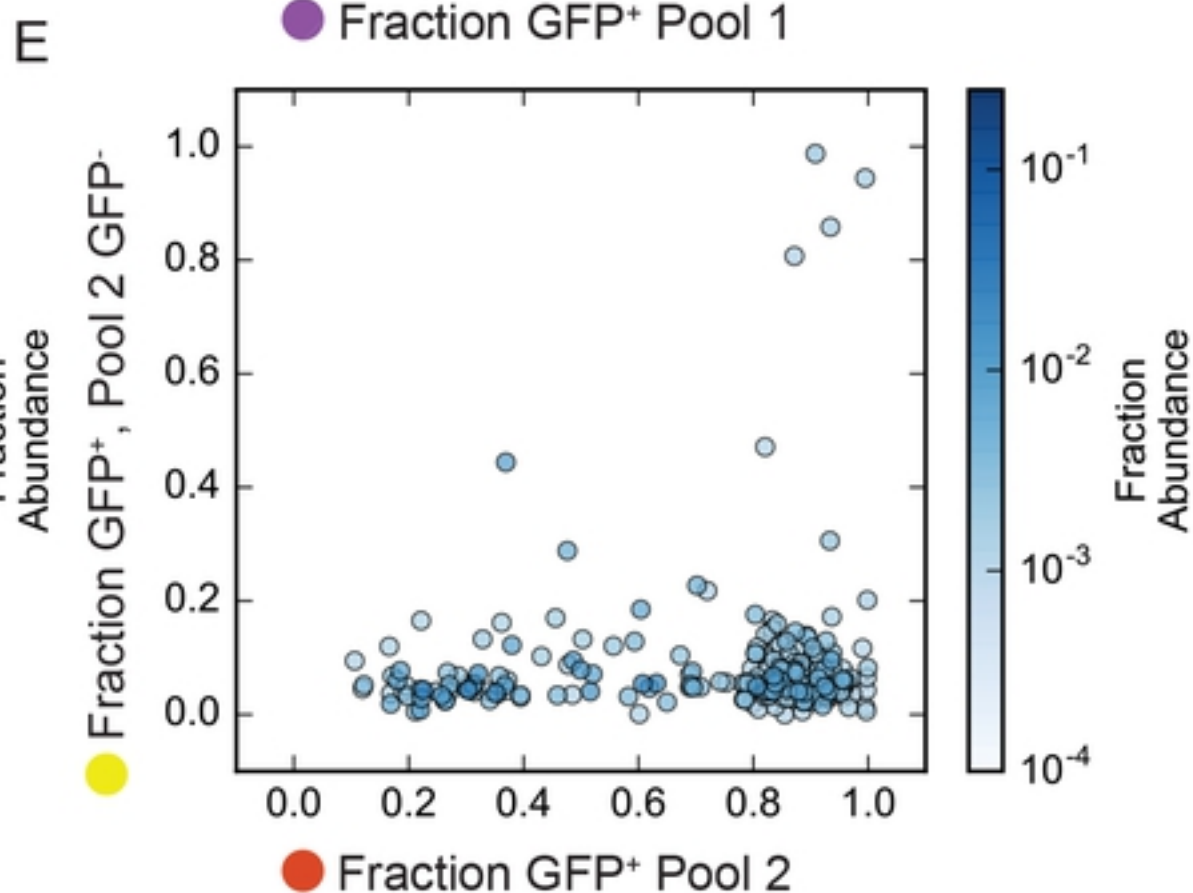

Fig5

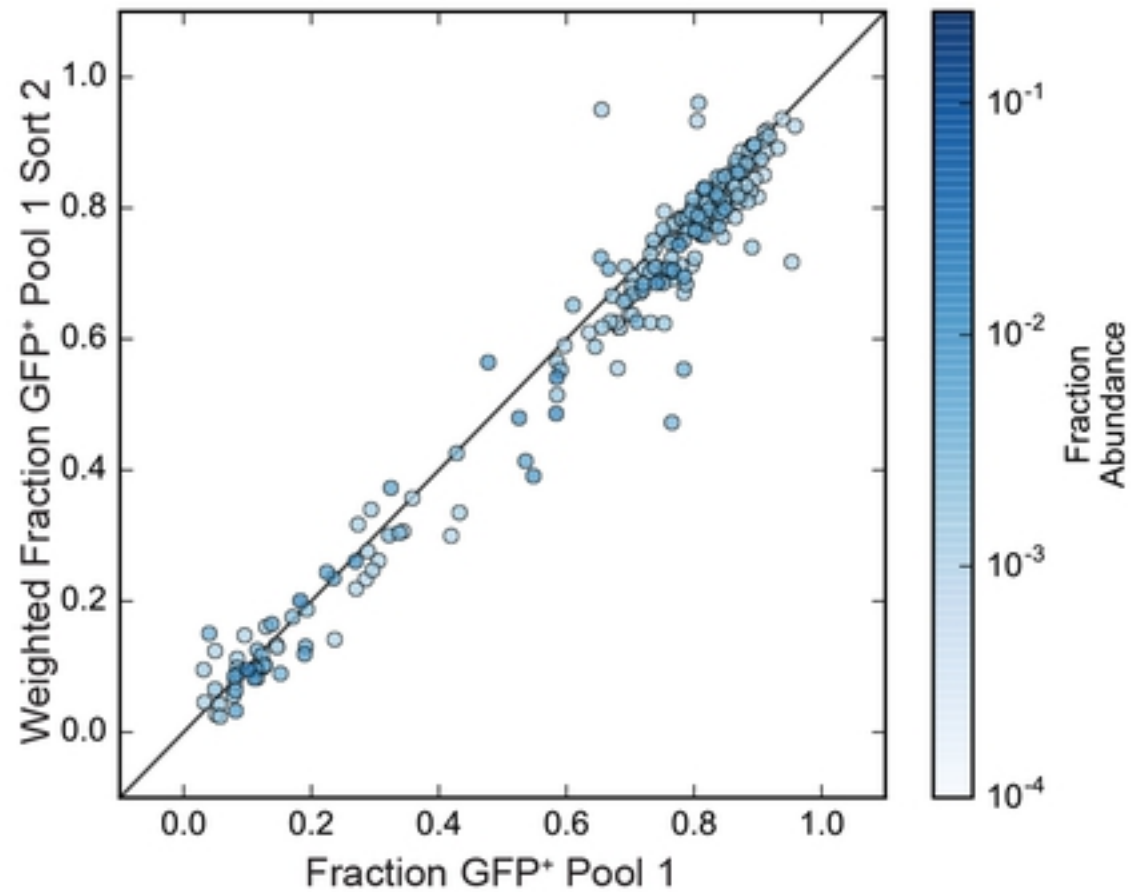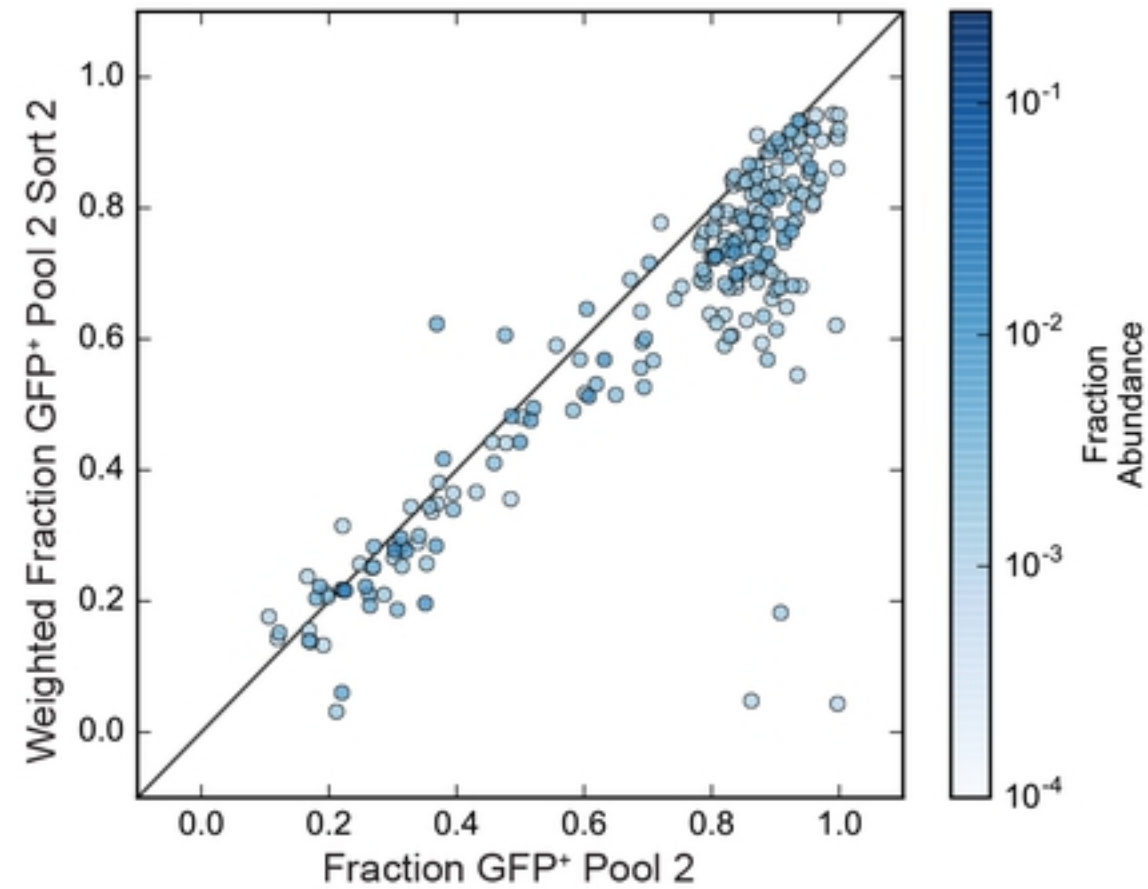

Fig6



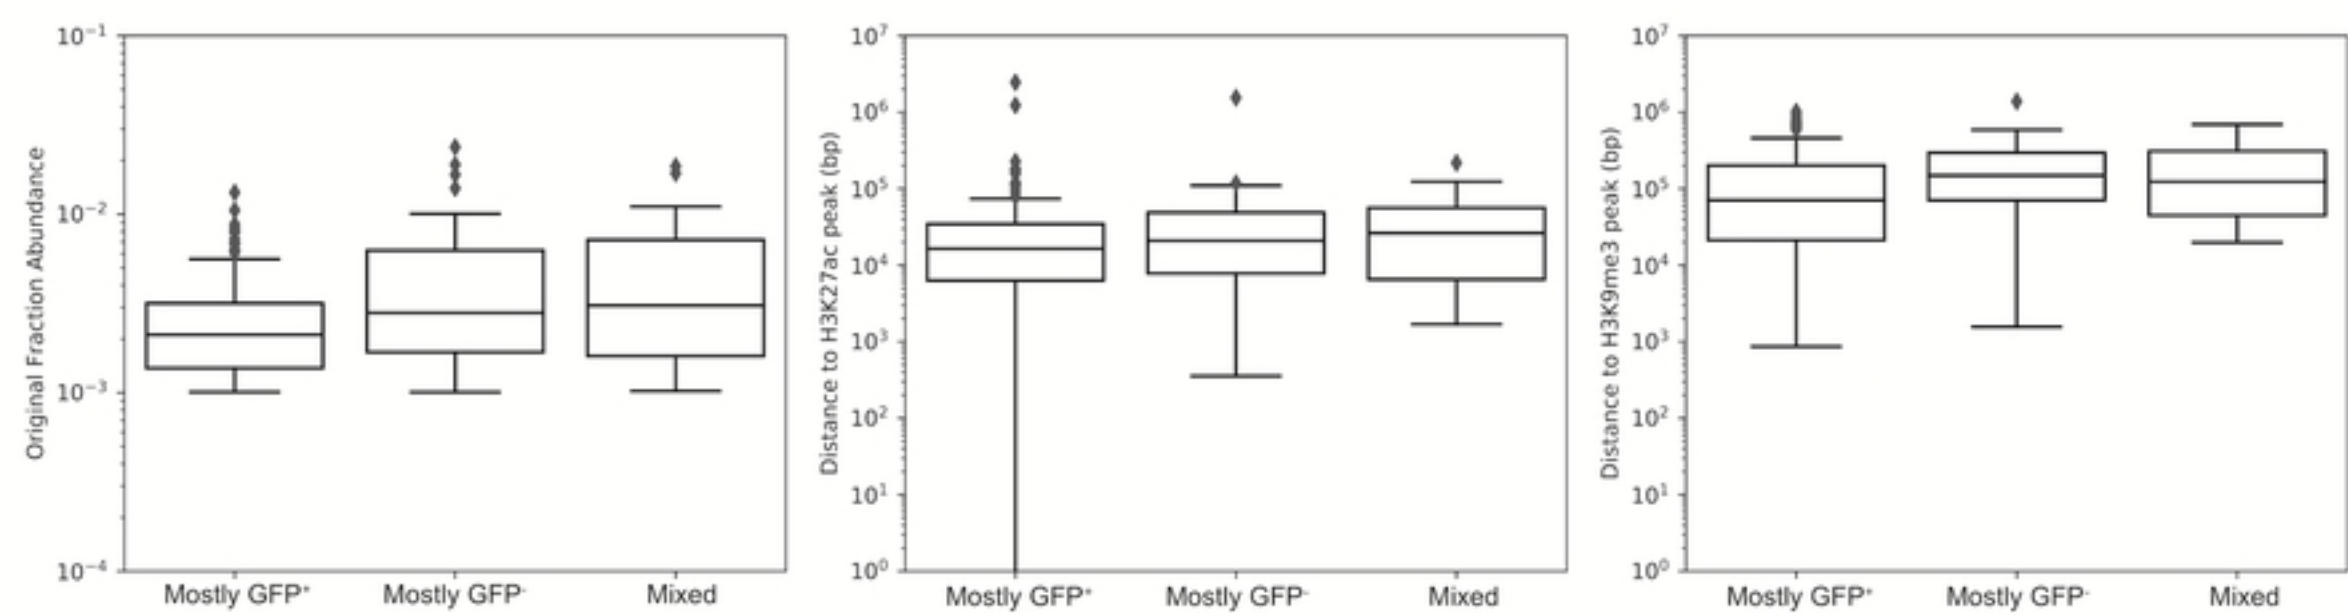

Fig7
